1 ***Type-3 Secretion System–induced pyroptosis protects Pseudomonas against cell-***  
2 ***autonomous immunity***

3  
4 Elif Eren<sup>1¶</sup>, Rémi Planès<sup>1¶</sup>, Julien Buyck<sup>2,3¶</sup>, Pierre-Jean Bordignon<sup>1</sup>, André Colom<sup>1</sup>, Olivier  
5 Cunrath<sup>2</sup>, Roland F. Dreier<sup>2</sup>, José C. Santos<sup>2</sup>, Valérie Duplan-Eche<sup>4</sup>, Emmanuelle Näser<sup>1</sup>,  
6 Antonio Peixoto<sup>1</sup>, Dirk Bumann<sup>2</sup>, Céline Cougoule<sup>1</sup>, Agnès Coste<sup>5</sup>, Olivier Neyrolles<sup>1</sup>, Petr  
7 Broz<sup>2,6\*</sup> & Etienne Meunier<sup>1,2\*#</sup>

8  
9  
10 <sup>1</sup> Institute of Pharmacology and Structural Biology (IPBS), University of Toulouse, CNRS,  
11 Toulouse; France

12 <sup>2</sup> University of Basel, Biozentrum, Focal Area Infection Biology, Basel; Switzerland

13 <sup>3</sup> UFR Medicine and Pharmacy, INSERM U1070, University of Poitiers, France

14 <sup>4</sup> Center of Physiopathology of Toulouse Purpan (CPTP), INSERM, CNRS, University of  
15 Toulouse, France.

16 <sup>5</sup> UMR152, University of Toulouse, IRD, Toulouse; France

17 <sup>6</sup> Department of Biochemistry, University of Lausanne, Epalinges; Switzerland

18  
19 Running Head: Pseudomonas-exploited pyroptosis drives infection

20  
21 # Address correspondence to: [etienne.meunier@ipbs.fr](mailto:etienne.meunier@ipbs.fr) (EM)

22 Present Address: Institute of Pharmacology and Structural Biology (IPBS), University of  
23 Toulouse, CNRS, Toulouse; France

24  
25 \*E. Meunier and \*P. Broz contributed equally

26 ¶ These authors contributed equally to this work.

27

28 **Abstract (139 words)**

29 Inflammasome-induced pyroptosis comprises a key cell-autonomous immune process  
30 against intracellular bacteria, namely the generation of dying cell structures. These so-  
31 called pore-induced intracellular traps (PITs) entrap and weaken intracellular microbes.  
32 However, the immune importance of pyroptosis against extracellular pathogens remains  
33 unclear. Here, we report that Type-3 secretion system (T3SS)-expressing *Pseudomonas*  
34 *aeruginosa* (*P. aeruginosa*) escaped PIT immunity by inducing a NLRC4 inflammasome-  
35 dependent macrophage pyroptosis response in the extracellular environment. To the  
36 contrary, phagocytosis of *Salmonella* Typhimurium promoted NLRC4-dependent PIT  
37 formation and the subsequent bacterial caging. Remarkably, T3SS-deficient  
38 *Pseudomonas* were efficiently sequestered within PIT-dependent caging, which favored  
39 exposure to neutrophils. Conversely, both NLRC4 and caspase-11 deficient mice  
40 presented increased susceptibility to T3SS-deficient *P. aeruginosa* challenge, but not to  
41 T3SS-expressing *P. aeruginosa*. Overall, our results uncovered that *P. aeruginosa* uses its  
42 T3SS to overcome inflammasome-triggered pyroptosis, which is primarily effective against  
43 intracellular invaders.

44

45

46

47

48

49

50

51

52

53

54

55 **Importance (119 words)**

56 Although innate immune components confer host protection against infections, the  
57 opportunistic bacterial pathogen *Pseudomonas aeruginosa* (*P. aeruginosa*) exploits the  
58 inflammatory reaction to thrive. Specifically the NLRC4 inflammasome, a crucial immune  
59 complex, triggers an Interleukin (IL)-1 $\beta$  and -18 deleterious host response to *P.*  
60 *aeruginosa*. Here, we provide evidence that, in addition to IL-1 cytokines, *P. aeruginosa*  
61 also exploits the NLRC4 inflammasome-induced pro-inflammatory cell death, namely  
62 pyroptosis, to avoid efficient uptake and killing by macrophages. Therefore, our study  
63 reveals that pyroptosis-driven immune effectiveness mainly depends on *P. aeruginosa*  
64 localization. This paves the way toward our comprehension of the mechanistic  
65 requirements for pyroptosis effectiveness upon microbial infections and may initiate  
66 targeted approaches in order to ameliorate the innate immune functions to infections.

67

68

69

70

71

72

73

74

75

76

77

78

79

80

81

82 **Manuscript length (5621 words)**

83 **Introduction**

84 Inflammasomes are pro-inflammatory cytosolic complexes whose activation leads  
85 to auto-processing of the protease caspase-1. Caspase-1 activation triggers the cleavage  
86 and release of the pro-inflammatory cytokines, interleukin (IL)-1 $\beta$  and IL-18 (1), as well as  
87 a pro-inflammatory form of cell death, called pyroptosis. Cleavage and activation of the  
88 pore forming effector gasdermin D (GSDMD) by caspase-1 or -11 can induce pyroptosis  
89 (2, 3). Several sensors contribute to inflammasome formation, including AIM2-like  
90 receptors (AIM2), PYRIN, and a subset of NOD-like receptors (NLRs), namely  
91 NLRP1/NLRP1B, NLRP3, NLRP6, NLRP7 and NLRC4, and the caspase-11-induced non-  
92 canonical inflammasome pathway (1).

93 Activation of the NLRC4 inflammasome follows an original path as it requires  
94 additional helper NLRs – the neuronal apoptosis inhibitory proteins (NAIPs) – that, upon  
95 ligand recognition, form hetero-oligomeric complexes with NLRC4 and promote its  
96 activation (4–10). Both NAIP5 and NAIP6 directly recognize cytosolic flagellin while NAIP-  
97 1 and -2 detect the type-3 secretion system (T3SS) apparatus needle and rod subunits,  
98 respectively (1, 6). Importantly, resulting IL-1 $\beta$  and IL-18 cytokine secretion mediates  
99 intracellular bacterial clearance by inducing, respectively, phagocyte recruitment and the  
100 production of the microbicidal cytokine interferon (IFN)- $\gamma$  (1, 6). A recently discovered and  
101 understudied cell-autonomous immune process known as pyroptosis promotes  
102 intracellular bacteria entrapment and weakening in pore-induced intracellular trap  
103 structures (PITs) (11–13), which facilitates subsequent bacterial elimination through  
104 efferocytosis (13–16). However, host-adapted bacteria can inhibit PITs formation, which  
105 enables bacterial proliferation (14).

106 While NLRC4 activation confers protection to various pathogens, including  
107 *Salmonella* Typhimurium, *Burkholderia pseudomallei* and *Legionella pneumophila* (1, 6), it

108 also drives host susceptibility to the opportunist bacteria *Pseudomonas aeruginosa* (*P.*  
109 *aeruginosa*) (17, 18). In particular, *P. aeruginosa* T3SS and flagellin components induce  
110 NLRC4-mediated IL-1 $\beta$  and IL-18 secretion, which inhibits protection mediated by both  
111 Th17 cells and anti-microbial peptides produced by airway epithelial cells (17, 18). This  
112 apparent paradox underlies complex host-microbe interactions, as NLRC4 confers  
113 protection against other pathogens that express T3SS and flagellin. Here, we examined  
114 the underlying host-microbe mechanisms through which NLRC4 specifically drives  
115 susceptibility to *P. aeruginosa*. We used *Salmonella enterica* serovar Typhimurium  
116 (SL1344) and PAO1, a *P. aeruginosa* strain, that expresses a functional T3SS (T3SS<sup>+</sup>) in  
117 parallel with an isogenic mutant of this strain, inactivated in the T3SS transcriptional  
118 regulator *exsA*, unable to express a functional T3SS apparatus (T3SS<sup>-</sup>).

119

## 120 **Results**

### 121 **Bacterial localization induces differential pyroptosis-dependent cell-autonomous** 122 **response in macrophages.**

123 To decipher the molecular mechanisms underlying NLRC4-mediated sensing of the  
124 bacterial pathogen *P. aeruginosa*, we infected bone marrow-derived macrophages  
125 (BMDMs) from wild-type (WT) and *Nlrc4*<sup>-/-</sup> mice with either T3SS-expressing (T3SS<sup>+</sup>) *P.*  
126 *aeruginosa* and *S. Typhimurium* strains (19) and we measured the capacity of both strains  
127 to trigger NLRC4 inflammasome-dependent pyroptotic cell death and IL-1 $\beta$  release. In  
128 agreement with previous published reports, these data indicate that both bacteria triggered  
129 cell-death in a T3SS and NLRC4-dependent manner within 3 hours of infection (MOI 15)  
130 (**Fig. 1A, Fig. S1A**).

131 While *S. Typhimurium* and *P. aeruginosa* have a different niche tropism (intracellular for  
132 *Salmonella* and extracellular for *Pseudomonas*), we hypothesized that the NLRC4  
133 response might lead to different bacterial fate in macrophages. Consequently, CFU assays

134 after 1 hour of infection (MOI 15) found more intracellular *S. Typhimurium* than *P.*  
135 *aeruginosa* in WT BMDMs (**Fig. 1B**). Strikingly, such differences in intracellular numbers of  
136 *P. aeruginosa* was partially lost in *Nlrc4*<sup>-/-</sup> macrophages and independent from *P.*  
137 *aeruginosa* T3SS-injected exoenzymes STY (**Fig. 1B, Fig. S1B**), suggesting that the  
138 NLRC4 inflammasome response contributed to *P. aeruginosa* avoiding macrophage  
139 uptake. Whereas *Salmonella* could efficiently establish an intracellular replicative niche in  
140 *Nlrc4*<sup>-/-</sup> BMDMs, intracellular *P. aeruginosa* failed to do so after 24 hours of infection (**Fig.**  
141 **1C**), which suggests that *P. aeruginosa* exploits NLRC4-dependent response to avoid  
142 macrophage intracellular-autonomous immunity. Phagocytosis is the main process by  
143 which macrophages engulf bacteria. Hence, inhibiting phagocytosis by cytochalasin D  
144 reduced NLRC4-dependent cell death and IL-1 $\beta$  release upon infection with *S.*  
145 *Typhimurium* but not with *P. aeruginosa* (**Fig. 1D**). Remarkably, T3SS<sup>+</sup>-induced  
146 phagocytosis-independent activation of the NLRC4 inflammasome was specific to only *P.*  
147 *aeruginosa*, as other T3SS-expressing bacteria triggered NLRC4 inflammasome  
148 responses in a phagocytosis-dependent manner (**Fig. S1C**). To rule out that actin  
149 polymerization might directly control NLRC4 activation, we electroporated purified flagellin  
150 in WT and *Nlrc4*<sup>-/-</sup> BMDMs in presence or absence of cytochalasin D. Cell death evaluation  
151 showed that cytochalasin D did not modify cytosolic flagellin-induced NLRC4  
152 inflammasome response (**Fig. S1D**). Thus, these results identified the unique capability of  
153 T3SS-expressing *P. aeruginosa* to promote NLRC4-inflammasome activation in a  
154 phagocytosis-independent manner.

155 “Pore-induced Intracellular Traps” (PITs) entrap intracellular *S. Typhimurium* (11–13). As  
156 *P.aeruginosa* induced phagocytosis-independent activation of the NLRC4 inflammasome,  
157 we reasoned that such process might be a virulence strategy to escape bacterial caging  
158 into PITs. Therefore, we infected primary WT BMDMs with both *P. aeruginosa* and *S.*  
159 *Typhimurium* strains (MOI 3) for 1h to induce PIT formation and evaluated the number of  
160 bacteria associated with pyroptotic structures (e.g. ASC<sup>+</sup> cells). Strikingly, our results

161 found higher amount of *Salmonella* associated within PIT structures than *P. aeruginosa*,  
162 showing that *P. aeruginosa*-activated NLRC4 inflammasome allowed escape from PIT-  
163 driven intracellular trapping (**Fig. 1E, F**).

164 Then, we aimed to determine whether pyroptosis have a differential *in vivo*  
165 regulatory function after *P. aeruginosa* and *S. Typhimurium* exposure. Using a peritoneal  
166 mouse model of infection ( $3 \times 10^6$  CFUs, 6h) with either strains, we evaluated the  
167 contribution of pyroptosis on the early clearance of each bacterial strain in WT or in  
168 *gasderminD*<sup>-/-</sup> (*gsdmD*<sup>-/-</sup>) mice, which are deficient at inducing pyroptosis. Therefore, mice  
169 lacking *gsdmD* showed an early (6h) susceptibility to STm challenge whereas they  
170 presented improved resistance to *P. aeruginosa* infection (**Fig. S1F**). Overall, these results  
171 demonstrated that *P. aeruginosa* exploited the NLRC4 inflammasome to escape  
172 pyroptosis-mediated capture and sequestration, a process that was reversed in absence  
173 of *Nlrc4*.

174

### 175 ***Pseudomonas* triggers T3SS-independent NLRC4 and Caspase11 inflammasome** 176 **activation in macrophages.**

177 Our results showed that both *S. Typhimurium* and *P. aeruginosa*-induced differential PIT-  
178 dependent bacterial trapping. Yet, we wanted to rule out that the observed phenotype  
179 could be driven by intrinsic properties of each bacterial strain, such as flagellin and T3SS  
180 immunogenicity and/or expression levels.

181 Therefore, we relied on a surprising observation where we found that infection of  
182 macrophages with a T3SS-deficient strain of *P. aeruginosa* still triggered early (3 hours)  
183 residual NLRC4 response and, late (4-10 hours) caspase11 non-canonical inflammasome  
184 pathway (**Fig. 2A; Figs. S2A, B**). Even though high doses (MOI 25, 50 or 100) of T3SS<sup>-</sup> *P.*  
185 *aeruginosa* were necessary to induce reduced levels of NLRC4 activation, residual  
186 inflammasome response was both still NLRC4- and -flagellin dependent, as T3SS<sup>-</sup>/*fliC*  
187 strains failed to elicit measurable IL-1 $\beta$  release as well as caspase-1 and gasdermin-D

188 (GSDMD) processing (**Figs. 2A, B; Fig. S2C**). Furthermore, we noted that flagellin  
189 complementation in both T3SS<sup>+</sup> and T3SS<sup>-</sup> strains restored NLRC4-driven cell death and  
190 IL-1 $\beta$  release (**Figs. S2D, E**). However, only live T3SS-deficient *P. aeruginosa* induced  
191 NLRC4-dependent IL-1 $\beta$  release as it was not detected using heat-killed (HK) and PFA-  
192 killed bacteria (20) (**Fig. S2F**). To exclude that genetic inactivation of *exsA* allowed  
193 residual T3SS expression, we tested *P. aeruginosa* lacking PscC, a key T3SS structural  
194 component (21). Importantly, *pscC* and *exsA*-deficient bacteria triggered comparable  
195 levels of NLRC4-dependent cell death and IL-1 $\beta$  release (**Fig. S2G**). These results  
196 indicate that activation of the NLRC4 inflammasome was not caused by residual T3SS  
197 expression.

198 In the host, cytosolic NAIP proteins bind flagellin or T3SS components and initiate  
199 NLRC4 oligomerization (6). To confirm direct involvement of flagellin in NLRC4 activation,  
200 we infected macrophages lacking either *Naip5* (*Naip5*<sup>-/-</sup>), the main flagellin sensor, or the  
201 5 different *Naips* (*Naip* <sup>$\Delta$ 1-6</sup>), with either T3SS<sup>+</sup> or T3SS<sup>-</sup> strain. Both *Naip5*<sup>-/-</sup> and *Naip* <sup>$\Delta$ 1-6</sup>  
202 BMDMs failed to undergo pyroptosis and release IL-1 $\beta$  when infected with either strain  
203 (**Fig. 2C**). Based on these results, we conclude that flagellin directly triggered the NLRC4  
204 inflammasome response during T3SS<sup>-</sup> *P. aeruginosa* infection.

205 Altogether, these findings reveal, in addition to the Caspase-11 non canonical  
206 inflammasome, an unrecognized and unexpected capacity of *P. aeruginosa* to alternatively  
207 activate the NAIP5/NLRC4 inflammasome in a T3SS-independent yet flagellin-dependent  
208 manner. These findings further suggest that flagellin can reach the host cell cytosol  
209 independently of bacterial secretion systems.

210

211 **T3SS<sup>-</sup> *P. aeruginosa*-containing damaged phagosomes associate to sequential**  
212 **activation of NLRC4 inflammasome and Caspase-11.**

213 While our results indicated that flagellin and LPS reach the host cytosol in absence  
214 of a functional T3SS, the underlying mechanism still remained unknown. We hypothesized



215 that a key candidate involves direct entry of *P. aeruginosa* into the intracellular  
216 compartment. Therefore we evaluated whether T3SS-independent activation of both  
217 NAIP5/NLRC4 and Caspase-11 inflammasomes required *P. aeruginosa* phagocytosis.  
218 Consequently, infection of macrophages with T3SS<sup>-</sup> *P. aeruginosa* showed that  
219 phagocytosis inhibition abrogated cell death, IL-1 $\beta$  release and Caspase-1 processing  
220 (**Fig. 3A-C**). Hence, these results show that, in absence of a functional T3SS, *P.*  
221 *aeruginosa* induces inflammasome response in a phagocytosis-dependent manner. As  
222 phagocytosis of T3SS-deficient *P. aeruginosa* is a prerequisite for inflammasome  
223 response, we hypothesized that NAIP5/NLRC4 and Caspase11 responses required that  
224 both flagellin and LPS reached the cytosol by leaking from *P. aeruginosa*-containing  
225 phagosomes. To visualize phagosomal membrane alterations, we probed for galectin-3  
226 (GAL3), a lectin that binds galactosides on permeabilized host cell endovesicles (22). If *P.*  
227 *aeruginosa*-containing phagosomes were compromised, we expected GAL3 recruitment  
228 around bacteria. To avoid unwanted GAL3 recruitment to permeabilized phagosomes from  
229 pyroptosis and not *P. aeruginosa* specifically, we infected immortalized *Casp1<sup>-/-</sup>/11<sup>-/-</sup>*  
230 macrophages with two T3SS mutants (e.g. T3SS<sup>-</sup> and T3SS/*fliC*) for 3 hours. Confocal  
231 microscopy revealed that GAL3 did target a small proportion (~ 6-10%) of intracellular  
232 T3SS<sup>-</sup> and T3SS/*fliC* bacteria (**Fig. 3D**). We then reasoned that cells with active  
233 inflammasomes, *i.e.* containing ASC specks, should also contain at least one GAL3-  
234 positive bacterium. Using macrophages expressing an active inflammasome (ASC  
235 specks<sup>+</sup>), we quantified the percentage of cells that had at least one GAL3- positive *P.*  
236 *aeruginosa*. We consistently found that approximately 45% of *iCasp1<sup>-/-</sup>/11<sup>-/-</sup>*  
237 macrophages presenting an ASC speck were also positive for GAL3-stained T3SS<sup>-</sup> *P.*  
238 *aeruginosa* (**Figs. 3D, E**), but we did not detect any specks using T3SS/*fliC* strain (**Fig.**  
239 **3E**). *Casp1<sup>-/-</sup>/11<sup>-/-</sup>* deficient BMDMs can form a NLRC4 inflammasome that recruit  
240 caspase-8 that also triggers cell death. To verify that in *Casp1<sup>-/-</sup>/11<sup>-/-</sup>* iBMDMs, GAL3  
241 recruitment to intracellular bacteria did not require caspase-8, we removed *Nlrc4* in GAL3-

242 mcherry expressing *Casp1<sup>-/-</sup>/11<sup>-/-</sup>* iBMDMs (**Fig. S3A**) and quantified GAL3 recruitment to  
243 T3SS<sup>-</sup> *P. aeruginosa*. We did not detect any defect for bacteria targeted by GAL3-  
244 mecherry in the *Nlrc4<sup>-/-</sup>/Casp1<sup>-/-</sup>/11<sup>-/-</sup>* iBMDMs, hence confirming that T3SS- *P.*  
245 *aeruginosa* is targeted by GAL3 independently of the NLRC4-dependent pathway (**Fig.**  
246 **S3B**). Overall, these results show that T3SS<sup>-</sup> *P. aeruginosa* trigger NLRC4 inflammasome  
247 from altered phagosomes.

248         Given that T3SS<sup>-</sup> *P. aeruginosa* were exposed to the cytosol, we speculated that  
249 phagosome alterations could also expose *P. aeruginosa* LPS to the host cell cytosol,  
250 which might promote caspase11 recruitment and activation. Thurston et al. showed that  
251 caspase11 was recruited to cytosolic Salmonella in infected epithelial cells (25). So, we  
252 sought to determine whether caspase11 associated with compromised *P. aeruginosa*-  
253 containing phagosomes. Microscopy observations of galectin-3+ (GAL3+) bacteria in IFN $\gamma$ -  
254 primed *Nlrc4<sup>-/-</sup>* iBMDMs showed recruitment of both GAL3 and active caspase on T3SS-  
255 *P. aeruginosa* after 3 hours of infection, which was not observed in *Nlrc4<sup>-/-</sup>/Casp11<sup>-/-</sup>*  
256 CRISPR-Cas9 iBMDMs (**Fig. 3F**). These results confirm that bacteria accessible to the cell  
257 cytosol directly recruited caspase-11.

258         Altogether, these results indicate that both NLRC4 and Caspase11 directly detected  
259 intracellular T3SS<sup>-</sup> *P. aeruginosa* flagellin and LPS from compromised phagosomes.

260

### 261 **Pyroptosis-induced PITs is efficient only against T3SS-deficient *Pseudomonas*.**

262         As we previously showed that T3SS-expressing *P. aeruginosa* and *S. Typhimurium*  
263 triggered differential PIT responses in macrophages, we evaluated whether pyroptosis-  
264 induced PITs also promoted restriction of intracellular *P. aeruginosa*. Primary WT BMDMs  
265 were infected with T3SS<sup>+</sup> or T3SS<sup>-</sup> for 3 h to induce PIT formation. Time-lapse microscopy  
266 revealed that cells with compromised plasma membranes (e.g. positive for the DNA  
267 impermeant binding probe TO-PRO-3) contained a high number of intracellular T3SS<sup>-</sup> *P.*  
268 *aeruginosa*, while few T3SS<sup>+</sup> *P. aeruginosa* were associated with dead cells (**Movie 1 that**

269 **refers to T3SS<sup>+</sup> PAO1-infected cells, Movie 2 that refers to T3SS<sup>-</sup>PAO1-infected**  
270 **cells).** In addition, confocal microscopy experiments showed that PITs (*i.e.* ASC<sup>+</sup> cells)  
271 were enriched specifically with T3SS<sup>-</sup> bacteria (**Fig. 4A, B**). Based on these results, we  
272 conclude that T3SS-expressing *P. aeruginosa* hijacked PIT-mediated intracellular bacterial  
273 entrapment and weakening, a process reversed in the absence of T3SS expression.

274 The capability of PITs to entrap mostly T3SS-deficient bacteria suggested that  
275 these structures might also have a direct or an indirect microbicidal function against these  
276 strains, as suggested by *S. Typhimurium* infection (13, 15). We then infected primary WT  
277 BMDMs with either T3SS<sup>+</sup> or T3SS<sup>-</sup> *P. aeruginosa* for 3h and monitored the microbicidal  
278 potential of PITs. PITs-associated or –unbound bacteria were harvested and exposed to  
279 purified neutrophils or PBS for 1h30. We quantified CFUs, which showed that PITs-  
280 associated bacteria specifically were more susceptible to neutrophil killing than the PITs-  
281 unbound fraction (**Fig. 4C**). Since phagocytosis of both T3SS<sup>+</sup> and T3SS<sup>-</sup> *P. aeruginosa*  
282 was comparable in *Nlrc4* deficient BMDMs (**Fig. 4D**), we hypothesized that pyroptosis  
283 induction in these cells would weaken both bacteria to the same extent. We infected *Nlrc4*  
284 <sup>-/-</sup> BMDMs with both T3SS<sup>+</sup> and T3SS<sup>-</sup> *P. aeruginosa* strains and subjected them to ATP  
285 stimulation to ensure similar NLRP3 inflammasome-dependent pyroptosis induction in both  
286 conditions. Intracellular bacteria were harvested, counted and exposed to a secondary  
287 stress signal (*i.e.* H<sub>2</sub>O<sub>2</sub>). Both intracellular *P. aeruginosa* strains showed the same  
288 increased susceptibility to H<sub>2</sub>O<sub>2</sub> (**Fig. 4E**), thus demonstrating that PIT-driven intracellular  
289 trapping was only efficient against T3SS-deficient *P. aeruginosa*. Finally, we performed a  
290 peritoneal mouse model of infection (3x10<sup>6</sup> CFUs, 4h) with GFP-expressing T3SS<sup>+</sup> or  
291 T3SS<sup>-</sup> *P. aeruginosa*, and evaluated bacteria-containing dead macrophages efferocytosis  
292 by neutrophils (13). Strickingly, recruited neutrophils (Ly6G<sup>+</sup>) having efferocytosed  
293 bacteria-containing macrophages (Ly6G<sup>+</sup>/F4/80<sup>+</sup>/GFP<sup>+</sup>) was more efficient against T3SS<sup>-</sup>  
294 *P. aeruginosa* than to T3SS<sup>+</sup> bacteria (**Fig. 4E; Fig. S4A**). Overall, these results

295 demonstrated that *P. aeruginosa* used its T3SS to escape PIT-mediated capture and  
296 sequestration. This process was reversed in absence of T3SS-expression or of *Nlrc4*.

297

298 **Both NLRC4 and Caspase-11 specifically protect against acute infection with T3SS-**  
299 **deficient *P. aeruginosa*.**

300 To evaluate the *in vivo* relevance of our findings, we infected WT and *Nlrc4*<sup>-/-</sup> mice  
301 with either T3SS<sup>+</sup> or T3SS<sup>-</sup> *P. aeruginosa*. Because T3SS<sup>-</sup> *P. aeruginosa* is highly  
302 susceptible to immune defenses (23), we infected mice with a higher dose of this strain.  
303 When infected for 18h with T3SS<sup>+</sup> *P. aeruginosa*, *Nlrc4*<sup>-/-</sup> mice presented lowered  
304 bacterial loads in the bronchoalveolar lavage fluid (BALF) than their WT counterparts (**Fig.**  
305 **5A**), consistent with a prior report (18). Remarkably, *Nlrc4*<sup>-/-</sup> mice infected with the T3SS<sup>-</sup>  
306 strain showed an increased BALF bacterial loads compared to WT controls after 18h of  
307 infection (**Fig. 5A**). The use of T3SS<sup>-</sup>/*fliC* *P. aeruginosa* did not show any involvement of  
308 NLRC4 on bacterial loads in BALFs, confirming that flagellin was the principal component  
309 that mediates *in vivo* NLRC4 response to T3SS-deficient *P. aeruginosa* (**Fig. S5A**).

310 While strongly reduced, the residual IL-1 $\beta$  levels found in BALFs of mice infected  
311 with the T3SS-deficient *P. aeruginosa* strain remained partially dependent on the NLRC4  
312 inflammasome (**Fig. 5B**), whereas infection with T3SS<sup>-</sup>/*fliC* bacteria showed no NLRC4-  
313 dependent IL-1 $\beta$  release (**Fig. S5B**). Since we previously showed that caspase-11 could  
314 also detect intracellular *P. aeruginosa*, we speculated about the potential immune  
315 importance of this pathway *in vivo*. Although *Casp11* deficient mice did not show  
316 significant involvement of caspase-11 at controlling the T3SS<sup>+</sup> strain, T3SS<sup>-</sup> and T3SS<sup>-</sup>  
317 *fliC* bacterial infection induced a higher susceptibility in these mice than their WT  
318 counterparts (**Figs. 5C, D; Figs. S5C, SD**). This result verified that both NLRC4 and  
319 caspase-11 play paired protective roles only against T3SS-deficient *P. aeruginosa*.

320 After airway infection, *P. aeruginosa* will encounter alveolar macrophages as the  
321 first phagocytic cells. So, we evaluated the importance of alveolar macrophages on

322 inflammasome-triggered differential host responses to *P. aeruginosa*. Mice infected with  
323 T3SS<sup>+</sup> and T3SS<sup>-</sup> *P. aeruginosa* showed that alveolar phagocyte depletion (**Fig. 5E**)  
324 increased alveolar loads of T3SS<sup>-</sup> *P. aeruginosa* (**Fig. S5E**) and strongly impaired IL-1 $\beta$   
325 release in the alveoli (**Fig. 5F**). These results demonstrated that alveolar macrophages  
326 controlled inflammasome-mediated immune responses to *P. aeruginosa* in mice.

327 Overall, these results demonstrate that T3SS-expressing *P. aeruginosa* exploited  
328 the NLRC4-dependent response to their own advantage, but T3SS deficiency uncovered  
329 host protective NLRC4- and caspase-11 responses.

330

## 331 Discussion

332 Although the NAIP-NLRC4 inflammasome primarily controls intracellularly adapted  
333 bacteria *Salmonella* or *Legionella* spp, several studies indicate the critical function of the  
334 T3SS-flagellin complex in mediating NLRC4-dependent host susceptibility to *P.*  
335 *aeruginosa* infection is still discussed (17, 18, 24)(25). Regarding *P. aeruginosa* infection,  
336 the deleterious functions of both IL-1 $\beta$  and IL-18 on immune control of T3SS-expressing *P.*  
337 *aeruginosa* infection is well documented (18, 26), yet the role of pyroptosis in this process  
338 remains unclear.

339 Here, we provide evidence that NLRC4-dependent pyroptosis of macrophages drive  
340 differential outcomes of T3SS-expressing *P. aeruginosa* and *S. Typhimurium*. Whereas *S.*  
341 *Typhimurium* remains entrapped into PITs, as previously demonstrated (13, 16), *P.*  
342 *aeruginosa*-induced extracellular activation of the NLRC4 inflammasome allows bacterial  
343 escape from macrophage and pyroptosis-driven cell-autonomous immunity. To our  
344 knowledge, such response is unique to *P. aeruginosa*, as other T3SS-expressing bacteria  
345 also required uptake to activate the NLRC4 inflammasome. A recent study found that *P.*  
346 *aeruginosa* T3SS triggered a Caspase-3/-7 deleterious host response in an ASC-  
347 dependent manner (27). Therefore, it is tempting to speculate that a similar mechanism

348 underlying T3SS-expressing *P. aeruginosa*-induced cell apoptosis could also mediate  
349 bacterial escape from host immune responses.

350 In addition, we uncovered that a T3SS-deficient strain of *P. aeruginosa* also  
351 triggered residual, but of immune importance, NAIP5/NLRC4 inflammasome, in a T3SS-  
352 independent manner, which is in agreement with findings of Faure et al., where lethal  
353 challenge of T3SS-deficient *P. aeruginosa* still induce a NLRC4-dependent response in  
354 mice. In addition, T3SS-expressing *P. aeruginosa* triggered inflammasome assembly  
355 through a process that did not heavily utilize phagocytosis (28–30). We do not believe that  
356 the presence of a genetically encoded phagosomal permeabilization system in *P.*  
357 *aeruginosa* is likely, as only a minority (~6-10%) of bacteria were accessible to cytosolic  
358 galectin-3. Another explanation could involve phagosome maturation-induced *P.*  
359 *aeruginosa* local production of outer-membrane vesicles (OMVs), which could expose  
360 bacterial ligands to host cell cytosol sensors (31–34). Conversely, *Nlrc4* deficiency or long-  
361 term infection of macrophages promoted a switch in the NLRC4 response to a LPS-  
362 induced caspase-11 non-canonical inflammasome path. Although previous results from  
363 others and our group indicated that OMVs from *P. aeruginosa* induced non-canonical  
364 inflammasome pathway in a phagocytosis-independent, yet endocytosis-dependent  
365 manner, our results here demonstrated that T3SS-deficient *P. aeruginosa*-triggered  
366 caspase-11 non-canonical inflammasome responses required bacterial uptake (31–34).  
367 Future investigations will be critical to determine the specific roles of OMVs and  
368 intracellular *P. aeruginosa* for nucleation of the non-canonical inflammasome route.  
369 Immunodeficiency, burn-, nosocomial- and ventilator-associated injuries render patients  
370 susceptible to chronic *P. aeruginosa* infection, in which most strains are deficient for T3SS  
371 and/or flagellin expression (35, 36). A recent report suggested that T3SS- *P. aeruginosa*  
372 promoted the non-canonical inflammasome pathway in an IFN- and GBP-dependent  
373 manner (37). Consistent with these data, we also showed that caspase-11 protected mice  
374 from acute infection with lethal doses of T3SS-deficient *P. aeruginosa*.

375 The *in vivo* function of NLRC4 to *P. aeruginosa* infection remains unresolved as it  
376 can be either protective or deleterious to the host in mouse models (24, 38). Our mouse  
377 model of acute infection revealed a deleterious role of NLRC4 on host defenses during  
378 exposure to T3SS-expressing *P. aeruginosa* (17, 18). Importantly, we demonstrated that  
379 *P. aeruginosa* T3SS deficiency induced both NLRC4- and caspase-11-driven host  
380 protection during infection. Attree's group analyzed isolated naturally T3SS deficient  
381 clinical isolates from patients (39). Some strains expressed flagellin and were motile (40).  
382 These findings warrant investigating whether these bacteria also induce a NLRC4  
383 dependent response.

384 Overall, our study uncovered that T3SS-expressing *P. aeruginosa* remained  
385 extracellular by triggering cell pyroptosis, a process that enabled bacteria to overwhelm  
386 macrophage PITs-induced host immunity. We further demonstrated that phagocytosis of  
387 *P. aeruginosa* that lacked T3SS expression triggered host protective pyroptosis in a T3SS-  
388 dependent manner through both NLRC4 and caspase-11 inflammasomes. In summary, we  
389 propose that bacterial localization drives the effectiveness of the inflammasome response  
390 during bacterial infection (**Graphical abstract**). Future studies will determine if this is a  
391 conserved response among bacterial pathogens.

392

393

394

395

396

397

398

399

## 400 **Methods**

401 All reagents and biological samples used in this study are listed in the **table S1**

### 402 **Mice**

403 *Casp11<sup>-/-</sup>*, *Casp1<sup>-/-</sup>/Casp11<sup>-/-</sup>*, *Nlr4<sup>-/-</sup>*, *Nlrp3<sup>-/-</sup>* and *Gsdmd<sup>-/-</sup>* mice have been  
404 previously described (41–43). Mice were bred in the animal facilities of the University of  
405 Basel (Basel, Switzerland) or at the IPBS institute (Toulouse, France). Bones from *Naip5<sup>-/-</sup>*  
406 and *Naip<sup>A1-6</sup>* mice were a kind gift from R. E Vance (UC Berkeley, USA) (43). Janvier and  
407 Charles Rivers companies provided WT mice.

408

### 409 **Animal infections**

410 6-8 age and sex-matched animals (8–10 weeks old) per group were infected  
411 intranasally with  $5 \times 10^6$  (PAO1 T3SS<sup>+</sup>) or  $1.5 \times 10^7$  (PAO1 T3SS<sup>-</sup> or T3SS<sup>-</sup>/*fliC*) CFUs of  
412 mid-late exponential phase *Pseudomonas aeruginosa* in 40μl PBS. Animals were  
413 sacrificed 18h after infection and bronchoalveolar fluids (BALFs) were collected in PBS.  
414 When specified, cellular contents (flow cytometry), bacterial loads (serial dilutions and  
415 CFU plating) and cytokine levels (ELISA) were evaluated. No randomization or blinding  
416 were done.

417

### 418 **Clodronate-induced alveolar phagocyte depletion**

419 C57BL/6 mice received intranasal instillation of 40μL of either clodronate or PBS  
420 loaded liposomes to deplete alveolar macrophages (18). 48 h later, mice were intranasally  
421 infected with either  $5 \times 10^6$  (PAO1 T3SS<sup>+</sup>) or  $1.5 \times 10^7$  (PAO1 T3SS<sup>-</sup>) CFUs of mid-late  
422 exponential phase *Pseudomonas aeruginosa* (OD of 1.0-1.6) in 40μl PBS. 18 h after  
423 infection, BALFs were collected and bacterial loads (serial dilutions and CFU plating),  
424 cytokine levels (ELISA) and immune cell contents were evaluated. Briefly, cells were  
425 pelleted (1000 rpm, 5 minutes) and alveolar macrophages were subsequently stained with



426 a cocktail of fluorochrome-conjugated antibodies detailed in the material section. Cells  
427 were then fixed in 4% PFA before fluorescence associated cell sorting (FACS) analysis  
428 using a LSRII instrument (BD Biosciences). Data analysis and processing were performed  
429 using FlowJo.10 software. The plot FSC-A vs FSC-H was used to discriminate doublets  
430 from single cells. Alveolar macrophages were defined as CD11c<sup>+</sup>/F480<sup>+</sup> in Ly6C<sup>-</sup>/Ly6G<sup>-</sup>  
431 /CD19<sup>-</sup>/TCRβ<sup>-</sup> population.

432

### 433 **Genetic invalidation of *Nlrc4* and *Caspase11* genes in *iCasp1<sup>-/-</sup>/Casp11<sup>-/-</sup>* and *iNlrc4<sup>-/-</sup>*** 434 ***immortalized BMDMs***

435 *Nlrc4* was knocked-out using the crispr/cas9 system in *iCasp1<sup>-/-</sup>/Casp11<sup>-/-</sup>* macrophages  
436 and *Casp11* was knocked-out from *iNlrc4<sup>-/-</sup>* macrophages. Single guide RNAs (sgRNA)  
437 specifically targeting *Nlrc4* exon3 (Forward: 5'CACCGTTACTGTGAGCCCTTGGAGC3'  
438 reverse: 5'AAACGCTCCAAGGGCTCACAGTAA-C3') and *Caspase-11* exon 2 forward  
439 (5'CACCGCTTAAGGTGTTGGAACAGCT3') reverse  
440 (5'AAACAGCTGTTCCAACACCTTAAGC3') were designed using Benchling tool  
441 (Benchling.com), and oligonucleotides were synthesized by Sigma-Aldrich. The gene-  
442 specific crispr guide RNA oligonucleotides were hybridized and cloned in Lenti-gRNA-  
443 Puromycin vector using BsmBI restriction sites (lentiGuide-Puro, Addgene 52963, from  
444 Feng Zhang lab). These constructs were transfected (using lipofectamine 2000) into  
445 HEK293T cells together with the lentiviral packaging vector p8.91 (from Didier Trono lab,  
446 EPFL, Switzerland) and a envelop VSVg-encoding vector (pMD.2G, Addgene 12259, from  
447 Didier Trono lab) for 48 h. Then, viral supernatants were harvested, filtered on 0.45 μm  
448 filter. Cas9-expressing recipient-cells either *iCasp1<sup>-/-</sup>/Casp11<sup>-/-</sup>* or *iNlrc4<sup>-/-</sup>* (1,000,000  
449 cells/well in 6-well plates) were generated by lentiviral transduction with Cas9-expressing  
450 lentiviral vector (lentiCas9-Blast, Addgene 52962, from Feng Zhang lab) and then infected  
451 with the lenti-Guide viral particles in presence of 8μg/ml polybrene and centrifugated for 2  
452 h at 2900 rpm at 32°C. 48 h later, medium was replaced and Puromycin selection

453 (10 $\mu$ g/mL) was applied to select positive clones for two weeks. Puromycin-resistant cells  
454 were sorted at the single cell level by FACS (Aria cell sorter). Individual clones were  
455 subjected to western blotting to confirm the absence of either *Nlr4* or *Caspase-11* gene  
456 products. To ensure clonal reproducibility, at least 2 positive clones were compared for  
457 inflammasome response.

458

### 459 **Cloning and cell transduction**

460 Galectin-3-morange construct was a kind gift from J. Enninga (Institut Pasteur,  
461 Paris, France). Galectin-3-morange coding sequence was sub-cloned into the pMSCV2.2  
462 plasmid by first excising EGFP at the EcoRI sites followed by insertion using NotI/XhoI  
463 sites. Immortalized WT, *Nlr4*<sup>-/-</sup>, *Casp1*<sup>-/-</sup>/*Casp11*<sup>-/-</sup> or *Nlr4*<sup>-/-</sup>/*Casp11*<sup>-/-</sup> BMDMs were  
464 then transduced with retroviral particles, positive cells for morange fluorescence were  
465 FACS to allow clonal selection.

466

### 467 **Cell culture and infections.**

468 Bone-marrow derived macrophages (BMDMs) were differentiated in DMEM  
469 (Invitrogen) with 10% v/v FCS (Thermo Fisher Scientific), 10% MCSF (L929 cell  
470 supernatant), 10 mM HEPES (Invitrogen), and nonessential amino acids (Invitrogen).  
471 BMDMs were seeded in 6-, 24-, or 96-well-plates at a density of 1.25x10<sup>6</sup>, 2.5x10<sup>5</sup>, or  
472 5x10<sup>4</sup> per well. When required BMDMs were pre-stimulated overnight with 100ng/mL of  
473 PAM3CSK4 (InvivoGen). For infections with *Pseudomonas* strains, bacteria were grown  
474 overnight in Luria Broth (LB) at 37 °C with aeration. Bacterial cultures were diluted 1/50  
475 and grew until mid-late exponential phase (OD of 1.0-1.6) and added to the macrophages  
476 at multiplicity of infection (MOI) of 25, 50 and 100, in serum and antibiotic-free medium  
477 (OPTIMEM), or as otherwise indicated. Then, to ensure homogenous infections, plates  
478 were centrifuged for 1 minute, 800 rpm. 1 h after infection, extracellular bacteria were  
479 killed by adding gentamicin (100 $\mu$ g/ml, Invitrogen). When specified, paraformaldehyde

480 (PFA)-killed (PFA 4%, 20 minutes) or heat-killed (95°C, 15 minutes) of *P. aeruginosa*  
481 strains were used to infect BMDMs at MOI of 50. When required, *Shigella flexneri* (M90T),  
482 *Chromobacter violaceum* or various *Salmonella* strains (SL1344) were grown in LB in the  
483 presence or absence of antibiotics (specified in the resource table) at 37°C with constant  
484 agitation overnight. To ensure proper T3SS and flagellin expression, bacteria were sub-  
485 cultured the next day in LB media for 3 h until reaching an OD of 0,6-1.

486 When required, Flagellin was electroporated with Neon™ Transfection System  
487 (ThermoFischer) according manufacturer's protocol. Briefly,  $5 \times 10^5$  cells were  
488 resuspended in Buffer R and 0.5 ug/ml Flagellin was electroporated in 10 µl tips using 2  
489 pulses of 1720V and 10 width. Cells were then plated in 24 well-plates.

490 Transfection of cells with Fagellin (Invivogen, 0, 5µg/mL/2,5x10<sup>5</sup> cells) or LPS (O111:B4,  
491 *E. coli*, 1µg/2,5x10<sup>5</sup> cells Invivogen) was achieved using FuGeneHD (Promega)  
492 transfection reagent in Opti-MEM culture medium (44).

493

#### 494 **Bone marrow Neutrophil isolation**

495 Neutrophils were isolated from bone-marrow cells of WT mice by positive selection using  
496 Anti-Ly6G MicroBeads UltraPure isolation kit (Miltenyi-Biotec, Anti-Ly6G MicroBeads  
497 UltraPure mouse) according to the manufacturer's instructions. Characterization of the  
498 purified population by Fluorescence Associated Cell Sorting showed an enrichment of  
499 more than 98% of Ly6G<sup>high</sup> cells.

500

#### 501 **Cytokine and pyroptosis measurement**

502 IL-1β (eBioscience) was measured by ELISA. Cell-death was assayed using LDH  
503 Cytotoxicity Detection Kit (Takara). To normalize for spontaneous lysis, the percentage of  
504 LDH release was calculated as follows: (LDH infected – LDH uninfected)/(LDH total lysis –  
505 LDH uninfected)\*100.

506

## 507 **Western blotting**

508 Cell and supernatant protein lysates were prepared as previously described. Antibodies  
509 used were mouse anti-mouse caspase-1 antibody (Casper, Addipogen), goat anti-mouse  
510 IL-1 $\beta$  antibody (AF-401-NA; R&D Systems), anti- $\beta$ -actin antibody (A1978; Sigma), anti-  
511 GAPDH (GTX100118; GeneTex), anti gasdermin-D (Abcam, ab209845), anti-caspase-11  
512 (Novus, NB120-10454), anti-NLRC4 (Abcam, ab201792) and anti-NLRP3 (AdipoGen, AG-  
513 20B-0014). After incubation with primary antibody the membrane was washed 3 times with  
514 TTBS, and then Immunoreactive bands were detected by incubation for 2 h with the  
515 appropriate secondary antibodies conjugated with horseradish peroxidase (Diagomics).  
516 Proteins of interest were visualized using ECL substrate (Biorad) and images were  
517 acquired using ChemiDoc Imaging System (Biorad). Working dilutions of the antibodies  
518 are listed in **table 1**.

519

## 520 **Intracellular CFU experiments**

521  $2.5 \times 10^5$  BMDMs were infected with various PAO1 strains at indicated MOIs for  
522 various times. For CFU assays after 24 hours stimulation, gentamicin protection assay  
523 was performed using gentamicin at 50 $\mu$ g/mL after 2 hours infections of macrophages.  
524 Supernatants were removed, and cells washed 5 times with PBS. Cells were then lysed in  
525 triton x-100 (Sigma), 0.1% and plated at 37°C overnight for CFUs numeration on LB-agar.

526

## 527 **Microscopy**

528  $2.5 \times 10^5$  BMDMs were seeded on glass coverslips and infected as described above.  
529 When desired, wells were washed three times with PBS and fixed with 4% PFA for 10  
530 minutes at 37°C. Excess of PFA was removed by PBS washes and quenching using 0,1M  
531 Glycine for 10 min at room temperature. Permeabilization and primary antibody staining  
532 were performed O/N at 4°C using Saponin 0.1%/BSA 3% solution. Stainings were  
533 performed using Hoescht (DNA labeling), rabbit anti-ASC (SCBT, 1/500), chicken anti-

534 *P.aeruginosa* LPS (1/500, Agrisera) or anti-CD45-2-APC (1/250, Biolegends). Coverslips  
535 were washed with Saponin/BSA solution and incubated with the appropriate secondary  
536 antibodies (1/500, Diagnostics). Cells were then washed 3 times with PBS and mounted on  
537 glass slides using Vectashield (Vectalabs). Coverslips were imaged using confocal Zeiss  
538 LSM 710 (Image Core facility, Biozentrum, Basel and CPTP, Toulouse) or an  
539 Olympus/Andor CSU-X1 Spinning disk microscope (Image core Facility, IPBS, Toulouse)  
540 using a 63x objective. Unless specified, for each experiment, 5-10 fields (~50-250 cells)  
541 were manually counted using Image J software.

542

### 543 **Time-lapse microscopy**

544  $5 \times 10^5$  iBMDMs Gal3-morange expressing cells were seeded in a 35 mm microdish  
545 (Ibidi). 1 hour before infection, cells were pre-stained with 0.1  $\mu$ M CFSE (Biolegend) and  
546 infected with T3SS<sup>+</sup> or T3SS<sup>-</sup> *P. aeruginosa* with a MOI of 25 or 50. 1 $\mu$ M of membrane  
547 impermeant fluorescent DNA binding probe TO-PRO<sup>®</sup>-3 (ThermoFisher) was also added  
548 to the culture medium. Live cell imaging was performed using an Olympus/Andor CSU-X1  
549 spinning disk microscope with a picture frequency of 5 minutes for 3-4 hours and videos  
550 were reconstructed using Image J software.

551

### 552 **PIT experiments**

553 We have set up a modified form of a published protocol (13). Unless otherwise  
554 specified, WT BMDMs were infected using an MOI of 50 PAO1 T3SS<sup>+</sup> or T3SS<sup>-</sup> for 3 h.  
555 Intracellular bacteria-associated to PITs were visualized and manually quantified by  
556 microscopy (Olympus/Andor CSU-X1 spinning disk or inverted confocal microscope Zeiss  
557 LSM 710, ~50 cells counted, 5-10 fields). For bacterial colony forming units number  
558 enumeration, cells were lysed in Triton X-100, 0.1% and plated on Luria Broth agar.

559

560

## 561 **Bacterial response to a secondary stress signal**

562 A modified version of published protocol was used (13). WT BMDMs were infected  
563 for 2 h with PAO1 T3SS<sup>+</sup> or T3SS<sup>-</sup> using MOI of 50. Then, both extracellular and PIT-  
564 associated bacteria were harvested. As intracellular bacteria recovery required cell lysis  
565 with TritonX-100 0.1%, extracellular bacteria were also incubated with TritonX-100 0.1%  
566 for 2 minutes. When specified, bacteria from cells and supernatants were added to 1mL  
567 LB supplemented with 50μM Hydrogen Peroxide (H<sub>2</sub>O<sub>2</sub>) or PBS for 45 minutes, at 37°C  
568 and then plated on LB agar plates.

569 For neutrophil killing assays, WT BMDMs (2.5x10<sup>5</sup> cells) were infected for 2 h with  
570 PAO1 T3SS<sup>+</sup> or T3SS<sup>-</sup> using MOI of 50. Both supernatant- and bacteria-containing PITs  
571 were exposed to neutrophils (1x10<sup>6</sup> cells) for 1.5 h. Then, cells were treated with Triton X-  
572 100 0.1% for 2 minutes, and CFU counts were enumerated on LB agar plates.

573

## 574 **ImageStreamX experiments**

575 WT mice (n=3 for each bacterial strain) were infected intraperitoneally with 3x10<sup>6</sup> CFUs in  
576 PBS (100μL/mouse) of either T3SS<sup>+</sup> or T3SS<sup>-</sup> GFP-expressing bacteria. 4 hours later,  
577 peritoneal lavages were collected in 2,5mL of PBS. Neutrophils were stained prior to  
578 fixation with anti-Ly6G (APC-Vio770, Miltenyi-Biotec Clone: REA526 | Dilution: 1:50).  
579 Then, cells were fixed and permeabilized with BD Fixation/Permeabilisation Kit according  
580 to the manufacturer's instructions, and macrophages were labeled with anti-F4/80 (BV421)  
581 (Biolegend Clone: BM8 | Dilution: 1:100). Data were acquired on ImageStreamX<sup>MKII</sup>  
582 (Amnis) device (CPTP Imaging and Cytometry core facility) and analyzed using IDEAS  
583 software v2.6 (Amnis). The gating strategy used to evaluate efferocytosis of bacteria-  
584 containing macrophages by Neutrophils was performed as follows: (i) gate was set on cells  
585 in focus and (ii) sub-gated on single cells. Then, we gated both on (iii) Ly6G<sup>+</sup> Neutrophils  
586 and on (iv) F4/80<sup>+</sup> macrophages within Ly6G<sup>+</sup> population. (v) To distinguish efferocytosis  
587 of intact from fragmented macrophages, we created a mask based on the Surface Area of

588 F4/80+ signal. This was applied to Ly6G<sup>+</sup>/F4/80<sup>+</sup> gate. (vi) The percentage of GFP<sup>+</sup>  
589 bacteria within the Ly6G<sup>+</sup>/F4/80<sup>+</sup> population was visualized and quantified.

590

### 591 **Bacterial KO generation and complementation**

592 The knockout vector pEXG2 was constructed and used based on the protocol  
593 described by Rietsch et al. (45) with the following modifications. Briefly, 700-bp sequences  
594 of the flanking regions of the selected gene were amplified by PCR with Q5 high fidelity  
595 polymerase (New England Biolabs). Then, the flanking regions were gel purified and  
596 inserted into pEXG2 plasmid by Gibson assembly (46). The assembled plasmid was  
597 directly transformed into competent SM10λpir using Mix&Go competent cells (Zymo  
598 Research Corporation) and plated on selective LB plates containing 50 µg/mL kanamycin  
599 and 15 µg/mL gentamicin. The resulting clones were sequenced, and mating was allowed  
600 for 4 h with PAO1 strain at 37°C. The mated strains were selected for single cross over on  
601 plates containing 15 µg/mL gentamicin and 20 µg/mL Irgasan (removal of *E.coli* SM10  
602 strains). The next day, some clones were grown in LB for 4 hours and streaked on 5%  
603 sucrose LB plates overnight at 30°C. *P. aeruginosa* clones were then checked by PCR for  
604 mutations. For flagellin complementation experiments, JBOC plasmid (homemade) was  
605 used to re-express flagellin gene (*fliC*) under its endogenous promoter in *fliC* deficient  
606 PAO1 strains. Briefly, PAO1 *fliC* and its promoter were PCR-amplified, purified and  
607 integrated in JBOC plasmid. SM10 *E.coli* were transformed with *fliC* plasmid and allowed  
608 to conjugate with PAO1 mutant strains as described above. Positive PAO1 strains were  
609 selected on Gentamicin-Irgasan plates and checked by subsequent PCRs. All primers  
610 were designed with Snapgene software (GSL Biotech LLC).

611

### 612 **Statistical analysis**

613 Statistical data analysis was performed using Prism 5.0a (GraphPad Software,  
614 Inc.). For comparison of two groups (cell death, cytokine secretion, CFU and microscopy-

615 based counts), we used two-tailed t-test. Bonferroni correction was applied for multiple  
616 comparisons to two-way ANOVA statistical analysis. Data are reported as mean with  
617 standard deviation (s.d). For animal experiments Mann-Whitney tests were performed. P  
618 values are given in figures, NS means non-significant, unless otherwise specified.  
619 Significance is specified as \*, \*\* or \*\*\* for P-values <0.05, <0.01 or <0.001 respectively.

620

## 621 **Data and software**

622 Fiji and Image J software was used for time-lapse and microscopy images  
623 processing and analysis. Snappgene software (GSL Biotech LLC) was used to design all  
624 primers. Cytometry data analysis and processing were performed using FlowJo.10  
625 software. ImageStreamX data were analyzed using IDEAS software v2.6 (Amnis).  
626 Benchling online software was used to design Crispr guides.

627

## 628 **Ethics Statement**

629 All animal experiments were approved (License 2535, Kantonales Veterinärämamt Basel-  
630 Stadt and License APAFIS#8521-2017041008135771, Minister of Research, France) and  
631 performed according to local guidelines (Tierschutz-Verordnung, Basel-Stadt and French  
632 ethical laws) and the European Union animal protection directive (Directive 2010/63/EU).

633

634

635

636

637

638

639

640

641



## 642 **Acknowledgements**

643 We thank the animal facilities, image core facilities and FACS core facility from  
644 Biozentrum (Univ. of Basel, Switzerland), IPBS (CNRS, Univ. of Toulouse, France) and  
645 CPTP (INSERM, Univ. of Toulouse, France) institutes. Specifically, we acknowledge (S.  
646 Allard and D. Daviaud from the CPTP imaging facility. Authors acknowledge V.M Dixit  
647 (Genentech) (*Nlrc4<sup>-/-</sup>*, *Casp11<sup>-/-</sup>*), R. Flavell (*Casp1<sup>-/-</sup>11<sup>-/-</sup>*), F. Sutterwala (*Nlrc4<sup>-/-</sup>*) for  
648 sharing mice. We also acknowledge J. Enninga (Institut Pasteur, Paris, France) for  
649 galectin-3 plasmid share and R.E. Vance and I. Rauch (University of California at  
650 Berkeley) for providing bones from mice deficient for *Naip5<sup>-/-</sup>* and *Naip<sup>A1-6</sup>*. We also thank  
651 Y. Rombouts and G.L. Villarino for manuscript reading and comments. We also thank  
652 funding partners. E.E. and E.M. are funded by a FRM “Amorçage Jeunes Equipes”  
653 number AJE20151034460. E.M. is also funded by an ATIP-AVENIR grant and an ERC  
654 StG INFLAME 804249. P.B. is funded by the Swiss National Science Foundation  
655 (310030\_165893). We thank Life Science Editors for editing assistance. Authors declare  
656 no conflict of interest.

657

## 658 **Author Contribution**

659 E.E, R.P, J.B, P.B and E.M designed the study; D.B, A.Coste and O.N provided essential  
660 mouse lines, reagents and expertize. E.E, R.P, J.B, P.J.B, A.Colom, O.C, R.F.D, J.V.S,  
661 C.C and E.M performed experiments; E.M wrote the manuscript, with contribution from  
662 O.N.

663

664

665

666

667

## 668 **References**

- 669 1. Broz P, Dixit VM. 2016. Inflammasomes: mechanism of assembly, regulation and  
670 signalling. *Nat Rev Immunol* 16:407–420.
- 671 2. Kayagaki N, Stowe IB, Lee BL, O'Rourke K, Anderson K, Warming S, Cuellar T,  
672 Haley B, Roose-Girma M, Phung QT, Liu PS, Lill JR, Li H, Wu J, Kummerfeld S,  
673 Zhang J, Lee WP, Snipas SJ, Salvesen GS, Morris LX, Fitzgerald L, Zhang Y,  
674 Bertram EM, Goodnow CC, Dixit VM. 2015. Caspase-11 cleaves gasdermin D for  
675 non-canonical inflammasome signalling. *Nature* 526:666–671.
- 676 3. Shi J, Zhao Y, Wang K, Shi X, Wang Y, Huang H, Zhuang Y, Cai T, Wang F, Shao  
677 F. 2015. Cleavage of GSDMD by inflammatory caspases determines pyroptotic cell  
678 death. *Nature* 526:660–665.
- 679 4. Broz P, von Moltke J, Jones JW, Vance RE, Monack DM. 2010. Differential  
680 requirement for Caspase-1 autoproteolysis in pathogen-induced cell death and  
681 cytokine processing. *Cell Host Microbe* 8:471–83.
- 682 5. Tenthorey JL, Haloupek N, López-Blanco JR, Grob P, Adamson E, Hartenian E,  
683 Lind NA, Bourgeois NM, Chacón P, Nogales E, Vance RE. 2017. The structural  
684 basis of flagellin detection by NAIP5: A strategy to limit pathogen immune evasion.  
685 *Science* 358:888–893.
- 686 6. Zhao Y, Shao F. 2015. The NAIP-NLRC4 inflammasome in innate immune detection  
687 of bacterial flagellin and type III secretion apparatus. *Immunol Rev* 265:85–102.
- 688 7. Zhao Y, Yang J, Shi J, Gong Y-N, Lu Q, Xu H, Liu L, Shao F. 2011. The NLRC4  
689 inflammasome receptors for bacterial flagellin and type III secretion apparatus.  
690 *Nature* 477:596–600.
- 691 8. Tenthorey JL, Kofoed EM, Daugherty MD, Malik HS, Vance RE. 2014. Molecular  
692 Basis for Specific Recognition of Bacterial Ligands by NAIP/NLRC4 Inflammasomes.  
693 *Mol Cell* 54:17–29.

- 694 9. Hu Z, Yan C, Liu P, Huang Z, Ma R, Zhang C, Wang R, Zhang Y, Martinon F, Miao  
695 D, Deng H, Wang J, Chang J, Chai J. 2013. Crystal Structure of NLRC4 Reveals Its  
696 Autoinhibition Mechanism. *Science* (80- ) 341:172–175.
- 697 10. Diebolder CA, Halff EF, Koster AJ, Huizinga EG, Koning RI. 2015. Cryoelectron  
698 Tomography of the NAIP5/NLRC4 Inflammasome: Implications for NLR  
699 ActivationStructure.
- 700 11. Davis MA, Fairgrieve MR, Den Hartigh A, Yakovenko O, Duvvuri B, Lood C, Thomas  
701 WE, Fink SL, Gale M. 2019. Calpain drives pyroptotic vimentin cleavage,  
702 intermediate filament loss, and cell rupture that mediates immunostimulation. *Proc*  
703 *Natl Acad Sci U S A* 116:5061–5070.
- 704 12. Wang J, Deobald K, Re F. 2019. Gasdermin D Protects from Melioidosis through  
705 Pyroptosis and Direct Killing of Bacteria. *J Immunol* ji1900045.
- 706 13. Jorgensen I, Zhang Y, Krantz BA, Miao EA. 2016. Pyroptosis triggers pore-induced  
707 intracellular traps (PITs) that capture bacteria and lead to their clearance by  
708 efferocytosis. *J Exp Med* 213:2113–2128.
- 709 14. Codo AC, Saraiva AC, dos Santos LL, Visconde MF, Gales AC, Zamboni DS,  
710 Medeiros AI. 2018. Inhibition of inflammasome activation by a clinical strain of  
711 *Klebsiella pneumoniae* impairs efferocytosis and leads to bacterial dissemination.  
712 *Cell Death Dis* 9:1182.
- 713 15. Jorgensen I, Lopez JP, Laufer SA, Miao EA. 2016. IL-1 $\beta$ , IL-18, and eicosanoids  
714 promote neutrophil recruitment to pore-induced intracellular traps following  
715 pyroptosis. *Eur J Immunol* 46:2761–2766.
- 716 16. Miao EA, Leaf IA, Treuting PM, Mao DP, Dors M, Sarkar A, Warren SE, Wewers  
717 MD, Aderem A. 2010. Caspase-1-induced pyroptosis is an innate immune effector  
718 mechanism against intracellular bacteria. *Nat Immunol* 11:1136–1142.
- 719 17. Faure E, Mear J-B, Faure K, Normand S, Couturier-Maillard A, Grandjean T, Balloy  
720 V, Ryffel B, Dessein R, Chignard M, Uyttenhove C, Guery B, Gosset P, Chamailard

- 721 M, Kipnis E. 2014. *Pseudomonas aeruginosa* Type-3 Secretion System Dampens  
722 Host Defense by Exploiting the NLRC4-coupled Inflammasome. *Am J Respir Crit*  
723 *Care Med* 189:799–811.
- 724 18. Cohen TS, Prince AS. 2013. Activation of inflammasome signaling mediates  
725 pathology of acute *P. aeruginosa* pneumonia. *J Clin Invest* 123:1630–1637.
- 726 19. Brutinel ED, Vakulskas CA, Brady KM, Yahr TL. 2008. Characterization of ExsA and  
727 of ExsA-dependent promoters required for expression of the *Pseudomonas*  
728 *aeruginosa* type III secretion system. *Mol Microbiol* 68:657–671.
- 729 20. Kupz A, Guarda G, Gebhardt T, Sander LE, Short KR, Diavatopoulos DA, Wijburg  
730 OLC, Cao H, Waithman JC, Chen W, Fernandez-Ruiz D, Whitney PG, Heath WR,  
731 Curtiss R, Tschopp J, Strugnell RA, Bedoui S. 2012. NLRC4 inflammasomes in  
732 dendritic cells regulate noncognate effector function by memory CD8+ T cells. *Nat*  
733 *Immunol* 13:162–169.
- 734 21. Hauser AR. 2009. The type III secretion system of *Pseudomonas aeruginosa*:  
735 infection by injection. *Nat Rev Microbiol* 7:654–65.
- 736 22. Thurston TLM, Wandel MP, von Muhlinen N, Foeglein A, Randow F. 2012. Galectin  
737 8 targets damaged vesicles for autophagy to defend cells against bacterial invasion.  
738 *Nature* 482:414–8.
- 739 23. Jyot J, Balloy V, Jouvion G, Verma A, Touqui L, Huerre M, Chignard M, Ramphal R.  
740 2011. Type II secretion system of *Pseudomonas aeruginosa*: in vivo evidence of a  
741 significant role in death due to lung infection. *J Infect Dis* 203:1369–77.
- 742 24. Sutterwala FS, Mijares LA, Li L, Ogura Y, Kazmierczak BI, Flavell RA. 2007.  
743 Immune recognition of *Pseudomonas aeruginosa* mediated by the IPAF/NLRC4  
744 inflammasome. *J Exp Med* 204:3235–45.
- 745 25. Tolle L, Yu F, Kovach MA, Ballinger MN, Newstead MW, Zeng X, Nunez G,  
746 Standiford TJ. 2015. Redundant and cooperative interactions between TLR5 and  
747 NLRC4 in protective lung mucosal immunity against *Pseudomonas aeruginosa*. *J*

- 748 Innate Immun 7:177–86.
- 749 26. Schultz MJ, Knapp S, Florquin S, Pater J, Takeda K, Akira S, van der Poll T. 2003.  
750 Interleukin-18 impairs the pulmonary host response to *Pseudomonas aeruginosa*.  
751 Infect Immun 71:1630–4.
- 752 27. Hughes AJ, Knoten CA, Morris AR, Hauser AR. 2018. ASC acts in a caspase-1-  
753 independent manner to worsen acute pneumonia caused by *Pseudomonas*  
754 *aeruginosa*. J Med Microbiol 67:1168–1180.
- 755 28. Amiel E, Lovewell RR, O’Toole GA, Hogan DA, Berwin B. 2010. *Pseudomonas*  
756 *aeruginosa* Evasion of Phagocytosis Is Mediated by Loss of Swimming Motility and  
757 Is Independent of Flagellum Expression. Infect Immun 78:2937–2945.
- 758 29. Lovewell RR, Patankar YR, Berwin B. 2014. Mechanisms of phagocytosis and host  
759 clearance of *Pseudomonas aeruginosa*. Am J Physiol Lung Cell Mol Physiol  
760 306:L591-603.
- 761 30. Patankar YR, Lovewell RR, Poynter ME, Jyot J, Kazmierczak BI, Berwin B. 2013.  
762 Flagellar motility is a key determinant of the magnitude of the inflammasome  
763 response to *Pseudomonas aeruginosa*. Infect Immun 81:2043–52.
- 764 31. Bitto NJ, Baker PJ, Dowling JK, Wray-McCann G, De Paoli A, Tran LS, Leung PL,  
765 Stacey KJ, Mansell A, Masters SL, Ferrero RL. 2018. Membrane vesicles from  
766 *Pseudomonas aeruginosa* activate the noncanonical inflammasome through  
767 caspase-5 in human monocytes. Immunol Cell Biol 96:1120–1130.
- 768 32. Finethy R, Luoma S, Orench-Rivera N, Feeley EM, Haldar AK, Yamamoto M,  
769 Kanneganti T-D, Kuehn MJ, Coers J. 2017. Inflammasome Activation by Bacterial  
770 Outer Membrane Vesicles Requires Guanylate Binding Proteins. MBio 8:e01188-17.
- 771 33. Santos JC, Dick MS, Lagrange B, Degrandi D, Pfeffer K, Yamamoto M, Meunier E,  
772 Pelczar P, Henry T, Broz P. 2018. LPS targets host guanylate-binding proteins to the  
773 bacterial outer membrane for non-canonical inflammasome activation. EMBO J  
774 37:e98089.

- 775 34. Vanaja SK, Russo AJ, Behl B, Banerjee I, Yankova M, Deshmukh SD, Rathinam  
776 VAK. 2016. Bacterial Outer Membrane Vesicles Mediate Cytosolic Localization of  
777 LPS and Caspase-11 Activation. *Cell* 165:1106–1119.
- 778 35. Mahenthiralingam E, Campbell ME, Speert DP. 1994. Nonmotility and phagocytic  
779 resistance of *Pseudomonas aeruginosa* isolates from chronically colonized patients  
780 with cystic fibrosis. *Infect Immun* 62:596–605.
- 781 36. Jain M, Ramirez D, Seshadri R, Cullina JF, Powers CA, Schulert GS, Bar-Meir M,  
782 Sullivan CL, McColley SA, Hauser AR. 2004. Type III Secretion Phenotypes of  
783 *Pseudomonas aeruginosa* Strains Change during Infection of Individuals with Cystic  
784 Fibrosis. *J Clin Microbiol* 42:5229–5237.
- 785 37. Balakrishnan A, Karki R, Berwin B, Yamamoto M, Kanneganti T-D. 2018. Guanylate  
786 binding proteins facilitate caspase-11-dependent pyroptosis in response to type 3  
787 secretion system-negative *Pseudomonas aeruginosa*. *Cell death Discov* 4:3.
- 788 38. Iannitti RG, Napolioni V, Oikonomou V, De Luca A, Galosi C, Pariano M, Massi-  
789 Benedetti C, Borghi M, Puccetti M, Lucidi V, Colombo C, Fiscarelli E, Lass-Flörl C,  
790 Majo F, Cariani L, Russo M, Porcaro L, Ricciotti G, Ellemunter H, Ratclif L, De  
791 Benedictis FM, Talesa VN, Dinarello CA, van de Veerdonk FL, Romani L. 2016. IL-1  
792 receptor antagonist ameliorates inflammasome-dependent inflammation in murine  
793 and human cystic fibrosis. *Nat Commun* 7:10791.
- 794 39. Elsen S, Huber P, Bouillot S, Couté Y, Fournier P, Dubois Y, Timsit JF, Maurin M,  
795 Attrée I. 2014. A type III secretion negative clinical strain of *Pseudomonas*  
796 *aeruginosa* employs a two-partner secreted exolysin to induce hemorrhagic  
797 pneumonia. *Cell Host Microbe*.
- 798 40. Reboud E, Elsen S, Bouillot S, Golovkine G, Basso P, Jeannot K, Attrée I, Huber P.  
799 2016. Phenotype and toxicity of the recently discovered *exlA*-positive *Pseudomonas*  
800 *aeruginosa* strains collected worldwide. *Environ Microbiol* 18:3425–3439.
- 801 41. Broz P, Newton K, Lamkanfi M, Mariathasan S, Dixit VM, Monack DM. 2010.

- 802 Redundant roles for inflammasome receptors NLRP3 and NLRC4 in host defense  
803 against *Salmonella*. J Exp Med 207:1745–1755.
- 804 42. Broz P, Ruby T, Belhocine K, Bouley DM, Kayagaki N, Dixit VM, Monack DM. 2012.  
805 Caspase-11 increases susceptibility to *Salmonella* infection in the absence of  
806 caspase-1. Nature 490:288–291.
- 807 43. Rauch I, Tenthorey JL, Nichols RD, Al Moussawi K, Kang JJ, Kang C, Kazmierczak  
808 BI, Vance RE. 2016. NAIP proteins are required for cytosolic detection of specific  
809 bacterial ligands in vivo. J Exp Med.
- 810 44. Rühl S, Broz P. 2015. Caspase-11 activates a canonical NLRP3 inflammasome by  
811 promoting K<sup>+</sup> efflux. Eur J Immunol 45:2927–2936.
- 812 45. Rietsch A, Vallet-Gely I, Dove SL, Mekalanos JJ. 2005. ExsE, a secreted regulator  
813 of type III secretion genes in *Pseudomonas aeruginosa*. Proc Natl Acad Sci  
814 102:8006–8011.
- 815 46. Gibson DG, Young L, Chuang R-Y, Venter JC, Hutchison CA, Smith HO. 2009.  
816 Enzymatic assembly of DNA molecules up to several hundred kilobases. Nat  
817 Methods 6:343–345.
- 818 47. Olson M V., Stover CK, Pham XQ, Erwin AL, Mizoguchi SD, Warren P, Hickey MJ,  
819 Brinkman FSL, Hufnagle WO, Kowalik DJ, Lagrou M, Garber RL, Goltry L, Tolentino  
820 E, Westbrook-Wadman S, Yuan Y, Brody LL, Coulter SN, Folger KR, Kas A, Larbig  
821 K, Lim R, Smith K, Spencer D, Wong GK-S, Wu Z, Paulsen IT, Reizer J, Saier MH,  
822 Hancock REW, Lory S. 2000. Complete genome sequence of *Pseudomonas*  
823 *aeruginosa* PAO1, an opportunistic pathogen. Nature 406:959–964.
- 824 48. Santos JC, Dick MS, Lagrange B, Degrandi D, Pfeffer K, Yamamoto M, Meunier E,  
825 Pelczar P, Henry T, Broz P. 2018. LPS targets host guanylate-binding proteins to the  
826 bacterial outer membrane for non-canonical inflammasome activation. EMBO J  
827 e98089.
- 828

829 **Figures & legends**

830

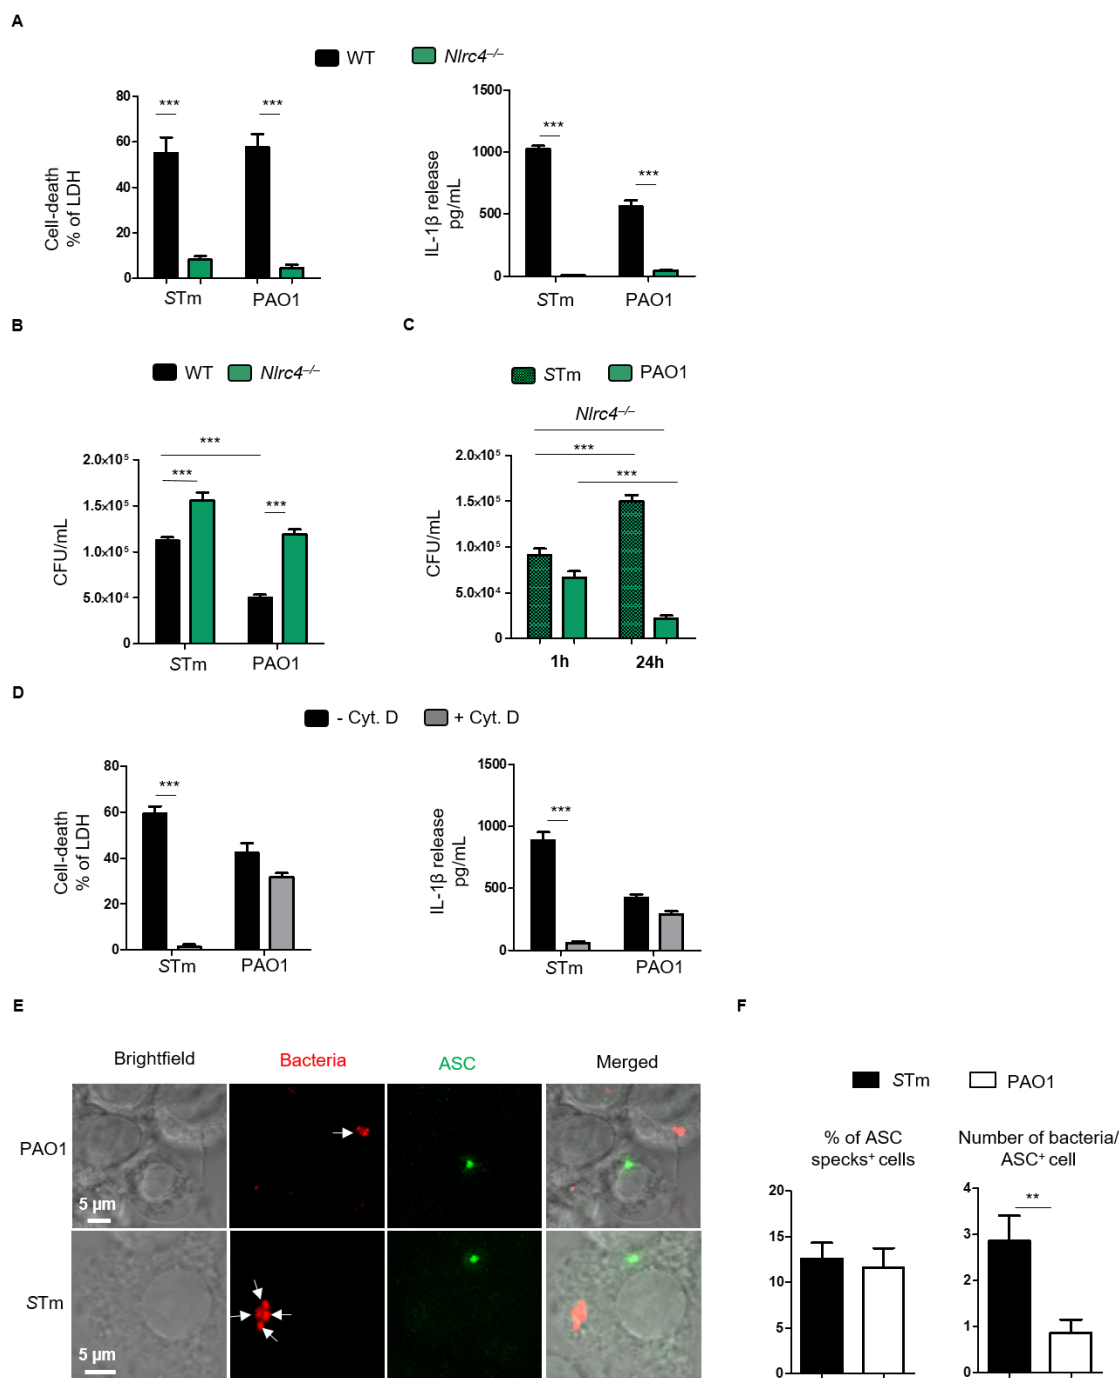

831

832 **Fig. 1: Efficient pyroptosis-induced PIT response in macrophages depends on**

833 **bacterial localization.**

834 BMDMs were primed with 100 ng/mL of the TLR2 ligand Pam<sub>3</sub>CSK<sub>4</sub> for 16 h to induce pro-

835 IL-1 $\beta$  expression and then infected with *S. Typhimurium* and *P. aeruginosa* for various

836 times.



837 **(A)** Measurement of LDH and IL-1 $\beta$  release in WT and *Nlrc4*<sup>-/-</sup> BMDMs infected for 3 h  
838 with PAO1 and *S. Typhimurium* at an MOI of 15.

839 **(B)** Phagocytosis scoring of WT or *Nlrc4*<sup>-/-</sup> BMDMs infected for 1 hour with PAO1 and *S.*  
840 *Typhimurium* at an MOI of 15.

841 **(C)** CFU evaluation of *Nlrc4*<sup>-/-</sup> BMDMs infected for various time (1-24h) with PAO1 and *S.*  
842 *Typhimurium* at an MOI of 15.

843 **(D)** Cell death (LDH) and IL-1 $\beta$  release evaluation in WT BMDMs, pre-incubated or not  
844 with cytochalasin D (0.2 $\mu$ g/mL) for 30 minutes, and then infected with either *P. aeruginosa*,  
845 *S. Typhimurium* (MOI 15).

846 **(E, F)** Microscopy illustrations and quantifications of PIT (ASC<sup>+</sup> cells)-associated *P.*  
847 *aeruginosa* and *S. Typhimurium* in WT BMDMs infected for 1H with an MOI 3.

848 Graphs show mean and s.d of quadruplicate wells (A and D) from three independent  
849 experiments pooled together. CFUs scoring are representative of one experiment  
850 performed 5 times.

851 Regarding microscopy quantification (E, F), 10 fields containing approximately 200 cells  
852 were quantified using the Image J software.

853

854

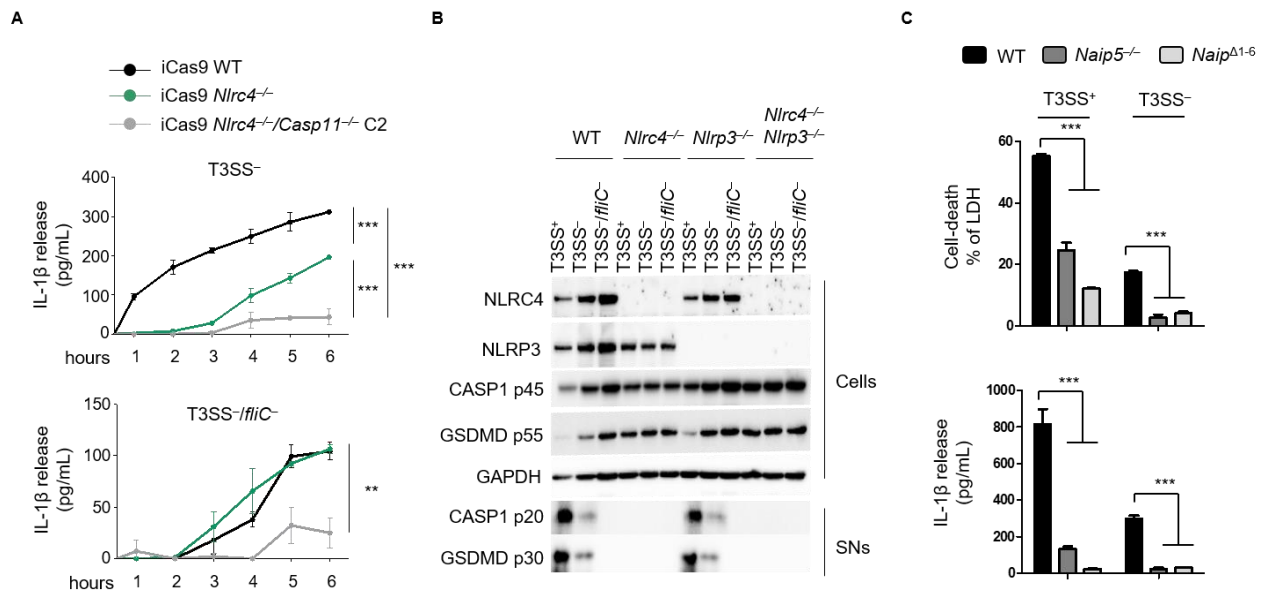

855

856 **Fig. 2: T3SS<sup>-</sup> *P. aeruginosa* activate both NLRC4 and Caspase11 inflammasomes.**

857 PAM3CSK4-primed (100 ng/mL) BMDMs were infected for various times with bacterial  
858 strains PAO1 T3SS<sup>+</sup>, T3SS<sup>-</sup> or T3SS<sup>-</sup>/*fliC*<sup>-</sup> at an MOI of 25, unless otherwise stated.

859 **(A)** Kinetics of IL-1β released by immortalized WT, *Nlrc4*<sup>-/-</sup> or *Nlrc4*<sup>-/-</sup>/*Casp11*<sup>-/-</sup> BMDMs  
860 infected with PAO1 T3SS<sup>-</sup> or T3SS<sup>-</sup>/*fliC*<sup>-</sup>.

861 **(B)** Western blot examination of processed caspase-1 (p20) and gasdermin-D (p30) in  
862 supernatants and pro-caspase-1 (p45), pro-gasdermin-D (p55), NLRP3, NLRC4 and  
863 GAPDH in cell lysates of WT, *Nlrc4*<sup>-/-</sup>, *Nlrp3*<sup>-/-</sup> and *Nlrc4*<sup>-/-</sup>/*Nlrp3*<sup>-/-</sup> BMDMs infected for 3  
864 h with PAO1 T3SS<sup>+</sup>, T3SS<sup>-</sup> or T3SS<sup>-</sup>/*fliC*<sup>-</sup>.

865 **(C)** Measurement of LDH and IL-1β release from WT, *Naip5*<sup>-/-</sup> or *Naip*<sup>Δ1-6</sup> BMDMs infected  
866 for 3 h with PAO1 T3SS<sup>+</sup> or T3SS<sup>-</sup>.

867 Graphs show mean and s.d of quadruplicate wells **(A, C)** pooled from three independent  
868 experiments. Immunoblotting **(B)** is representative of one experiment performed two  
869 times.

870

871

872

873

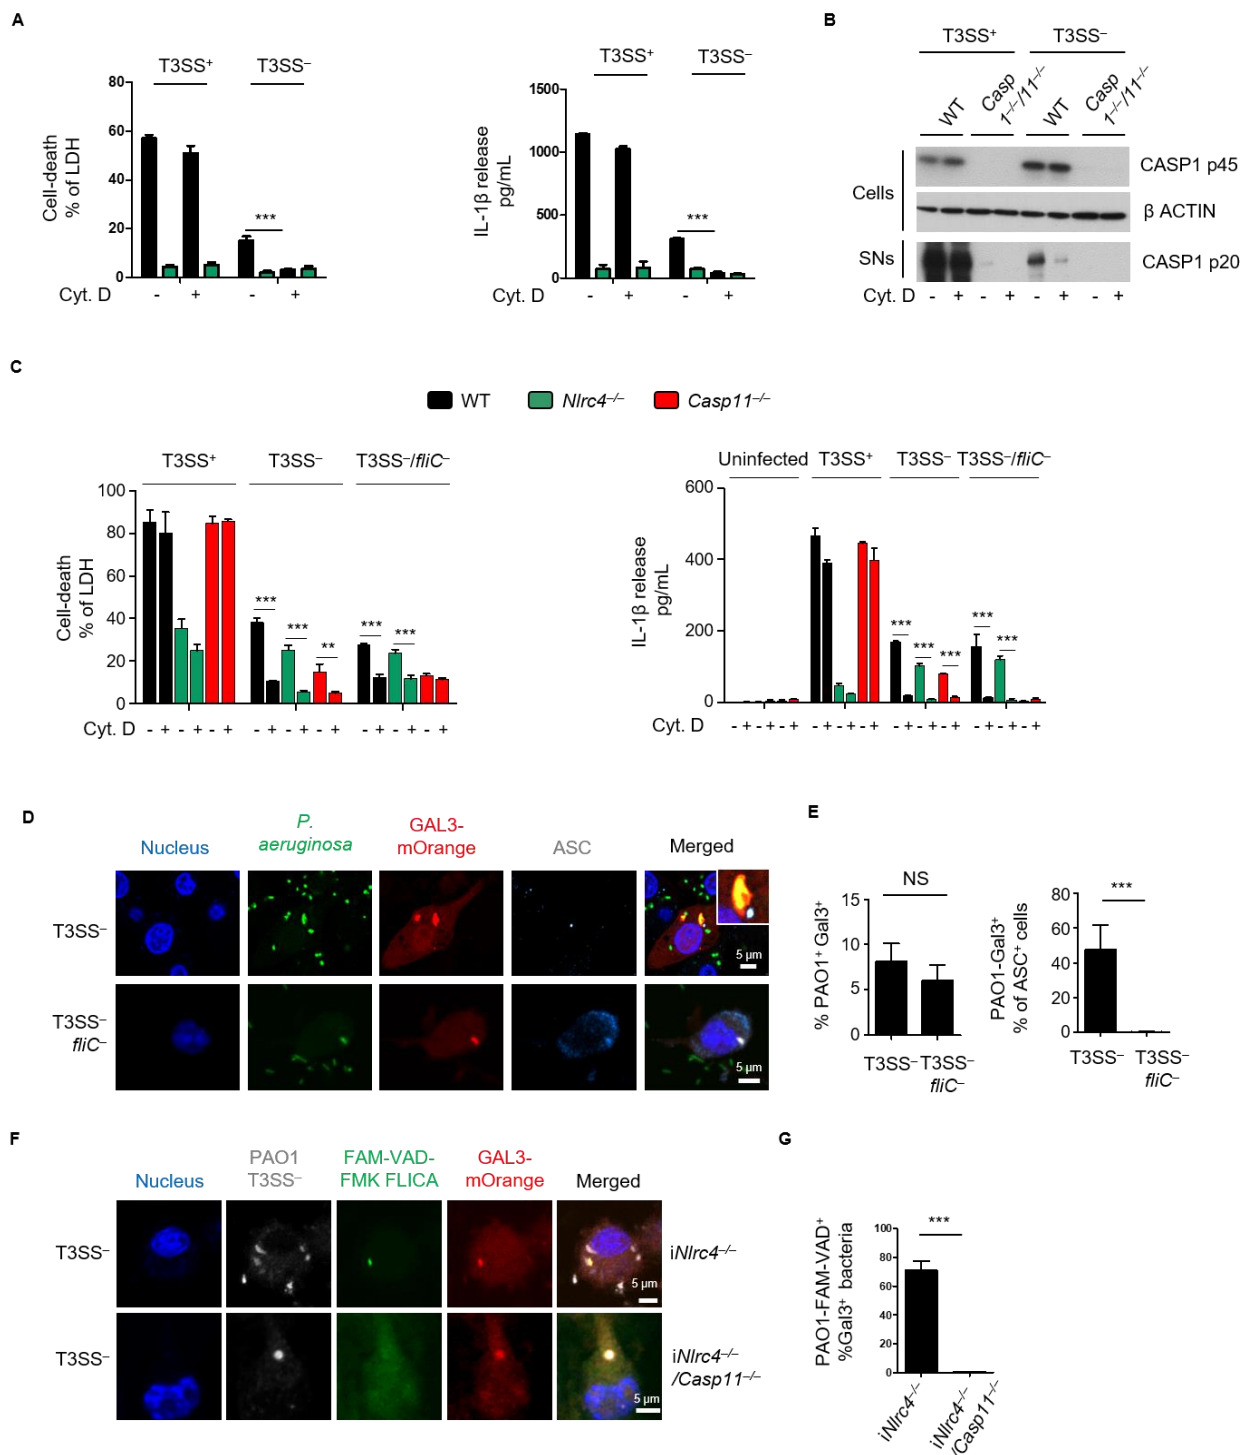

874

875 **Fig. 3: T3SS<sup>-</sup> *P. aeruginosa* associate to damaged phagosomes to promote**  
 876 **inflammasome response.**

877 PAM3CSK4-primed BMDMs were infected with various *Pseudomonas aeruginosa* strains  
 878 at an MOI of 25, unless specified.

879 **(A)** LDH and IL-1 $\beta$  released by WT and *Nlr4*<sup>-/-</sup> BMDMs, pre-incubated or not with  
880 cytochalasin D (0.2 $\mu$ g/mL) for 30 minutes, and then infected for 3 h with PAO1 T3SS<sup>+</sup> or  
881 T3SS<sup>-</sup>.

882 **(B)** Western blot analysis of cleaved CASP1 (p20) in cell supernatants and of pro-CASP1  
883 and  $\beta$ -actin in cell extracts of WT and *Casp1*<sup>-/-</sup>/*11*<sup>-/-</sup> BMDMs infected for 3 h with T3SS<sup>+</sup> or  
884 T3SS<sup>-</sup> PAO1.

885 **(C)** LDH and IL-1 $\beta$  release in WT, *Nlr4*<sup>-/-</sup> or *Casp11*<sup>-/-</sup> BMDMs, pre-incubated or not with  
886 cytochalasin D (0.2 $\mu$ g/mL) for 30 minutes, and then infected for 10 h with PAO1 T3SS<sup>+</sup>,

887 **(D, E)** Fluorescence microscopy observations and quantifications of galectin-3 targeted  
888 PAO1 T3SS<sup>-</sup> or T3SS<sup>-</sup>/*fliC* (MOI 25, 3 hours infection) in *Casp-1*<sup>-/-</sup>/*11*<sup>-/-</sup> immortalized  
889 BMDMs transduced with galectin-3-morange.

890 **(F, G)** Observations and quantifications of FAM-VAD-FMK FLICA probe recruitment on  
891 GAL-3-mOrange<sup>+</sup> *Pseudomonas aeruginosa* (T3SS<sup>-</sup>) in IFN $\gamma$ -primed immortalized (i)  
892 *iNlr4*<sup>-/-</sup>/GAL3-morange and *iNlr4*<sup>-/-</sup>/*Casp11*<sup>-/-</sup>/GAL3-mOrange BMDMs 3 h after  
893 infection. Caspase-11 is in green, galectin-3 in red, bacteria in grey and nuclei in blue.

894 Graphs show mean and s.d. **(A, C)** represent pooled data from at least three independent  
895 experiments performed in quadruplicate. **(B)** is representative of one experiment performed  
896 in duplicate. **(D, F)** Microscopy quantification of 10 fields containing approximately 200  
897 cells performed using the Image J software.

898

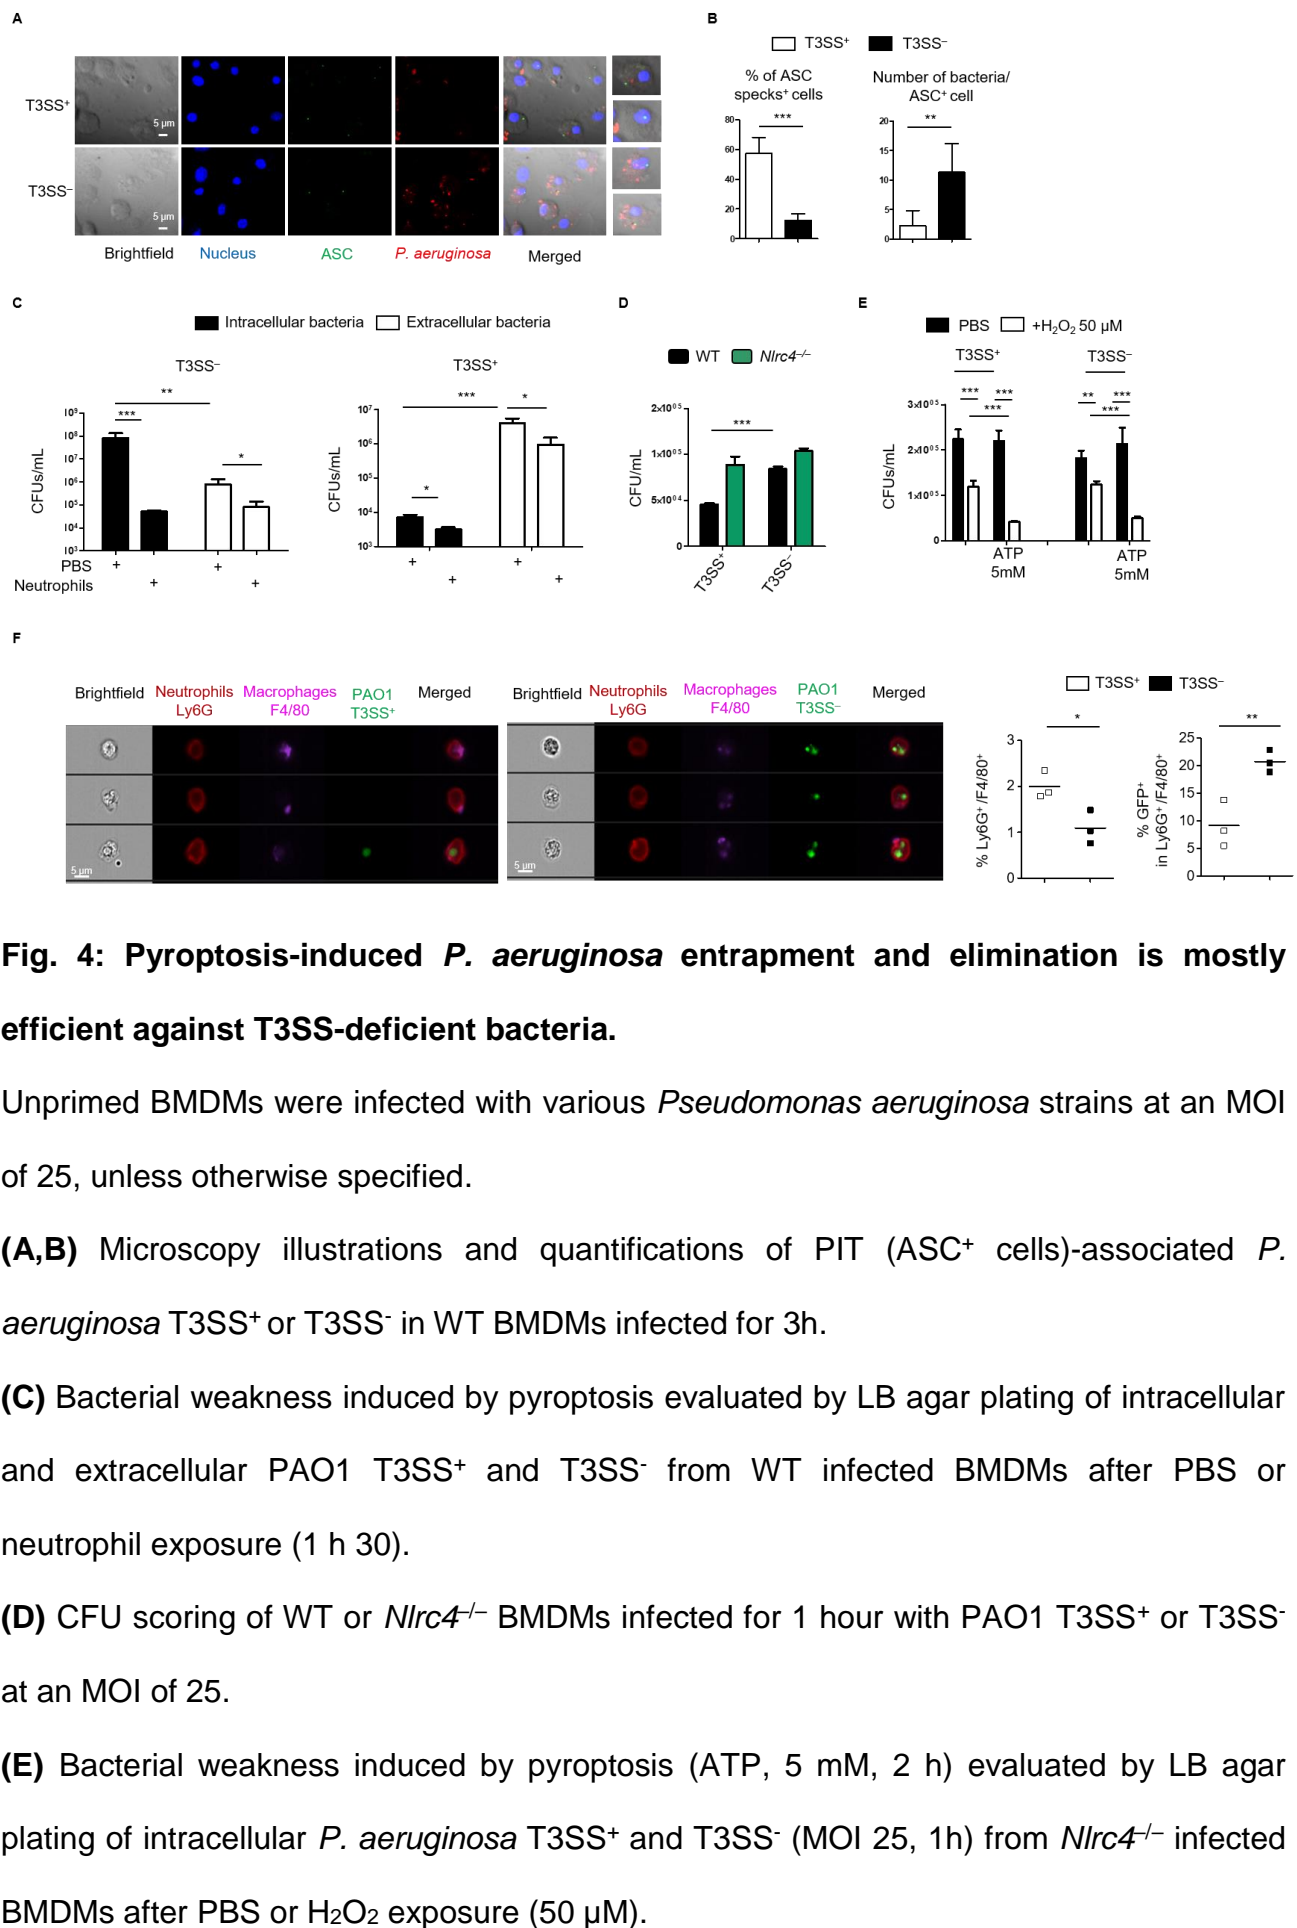

899

900 **Fig. 4: Pyroptosis-induced *P. aeruginosa* entrapment and elimination is mostly**  
 901 **efficient against T3SS-deficient bacteria.**

902 Unprimed BMDMs were infected with various *Pseudomonas aeruginosa* strains at an MOI  
 903 of 25, unless otherwise specified.

904 **(A,B)** Microscopy illustrations and quantifications of PIT (ASC<sup>+</sup> cells)-associated *P.*  
 905 *aeruginosa* T3SS<sup>+</sup> or T3SS<sup>-</sup> in WT BMDMs infected for 3h.

906 **(C)** Bacterial weakness induced by pyroptosis evaluated by LB agar plating of intracellular  
 907 and extracellular PAO1 T3SS<sup>+</sup> and T3SS<sup>-</sup> from WT infected BMDMs after PBS or  
 908 neutrophil exposure (1 h 30).

909 **(D)** CFU scoring of WT or *Nlrc4*<sup>-/-</sup> BMDMs infected for 1 hour with PAO1 T3SS<sup>+</sup> or T3SS<sup>-</sup>  
 910 at an MOI of 25.

911 **(E)** Bacterial weakness induced by pyroptosis (ATP, 5 mM, 2 h) evaluated by LB agar  
 912 plating of intracellular *P. aeruginosa* T3SS<sup>+</sup> and T3SS<sup>-</sup> (MOI 25, 1h) from *Nlrc4*<sup>-/-</sup> infected  
 913 BMDMs after PBS or H<sub>2</sub>O<sub>2</sub> exposure (50 μM).

914 **(F)** ImagestreamX quantification of the % of (i) Neutrophils (Ly6G<sup>+</sup>)/macrophage (F4/80<sup>+</sup>)  
915 and, (ii) Neutrophils (Ly6G<sup>+</sup>)/macrophages (F4/80<sup>+</sup>)/bacteria (GFP<sup>+</sup>) in the peritoneal cavity  
916 of WT mice infected for 4 h with 3.10<sup>6</sup> CFUs of T3SS<sup>+</sup> or T3SS<sup>-</sup> *P. aeruginosa*. Single dots  
917 are representative of each individual mouse infected with either strain of *P. aeruginosa*.  
918 Images represent the acquisition of more than 100 000 total events. Upper image panel  
919 and lower image panel show representatives images from the Neutrophils  
920 (Ly6G<sup>+</sup>)/macrophages (F4/80<sup>+</sup>) gate obtained from mice infected with T3SS<sup>+</sup> or T3SS<sup>-</sup> *P.*  
921 *aeruginosa* respectively. Here, three independent experiments were conducted.  
922 All data **(A-F)** are expressed as mean and s.d. Data are representative of three  
923 independent experiments.

924

925 **Movie 1** shows T3SS<sup>+</sup> PAO1 mcherry entrapment into dead cells and refers to **Fig. 4.**

926 **Movie 2** shows T3SS<sup>-</sup> PAO1 mcherry entrapment into dead cells and refers to **Fig. 4.**

927

928

929

930

931

932

933

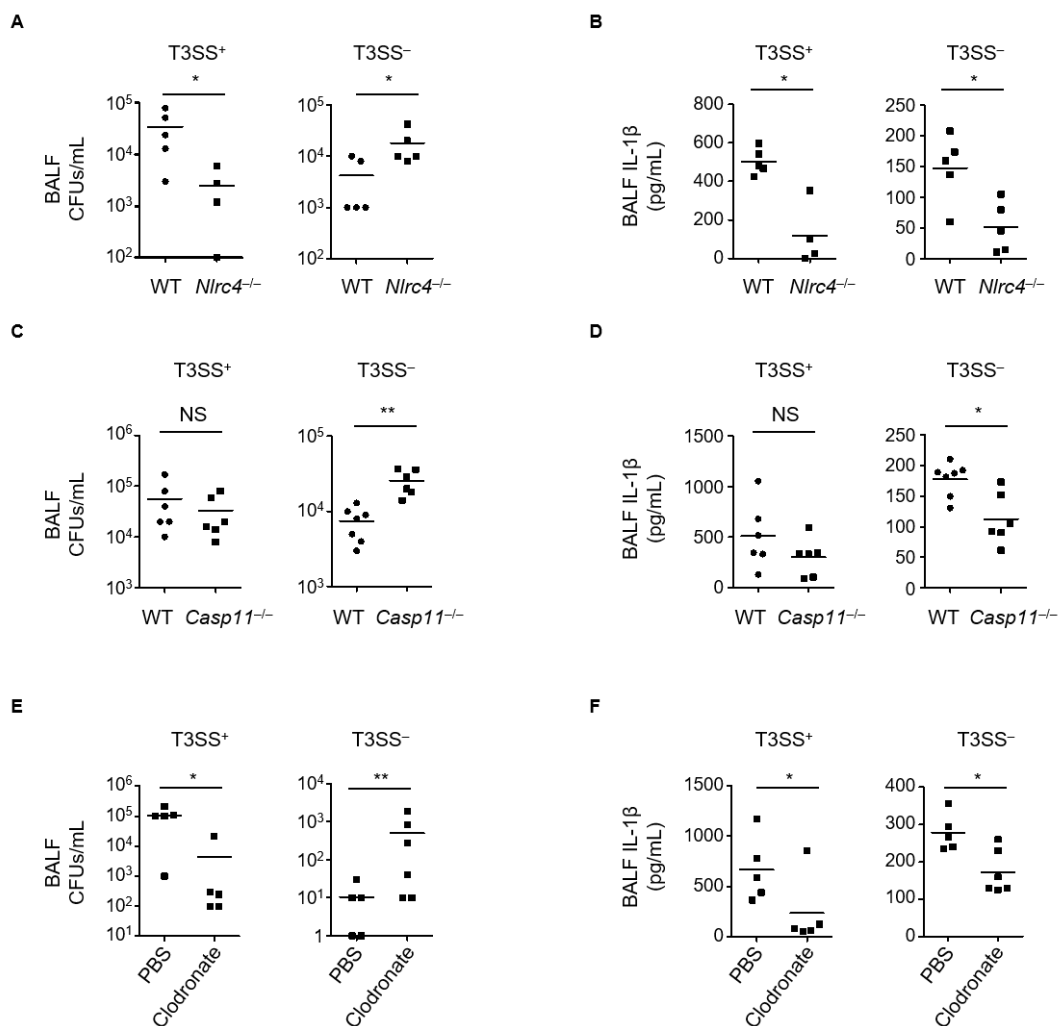

934

935 **Fig. 5: Both NLRC4 and Caspase-11 only protect against acute infection with T3SS-**  
 936 **deficient *P. aeruginosa*.**

937 **(A, C)** BALF PAO1 CFU scoring after 18 h of WT, *Nlrc4*<sup>-/-</sup> **(A)** or *Casp11*<sup>-/-</sup> **(C)** mice  
 938 infected with either T3SS<sup>+</sup> or T3SS<sup>-</sup> *P. aeruginosa* strains at 5x10<sup>6</sup> (T3SS<sup>+</sup>) and 1.5x10<sup>7</sup>  
 939 (T3SS<sup>-</sup>) CFUs respectively.

940 **(B, D)** BALF IL-1β release assay in mice infected as described in **(A, C)**.

941 **(E, F)** Role of alveolar macrophages on the immune response to PAO1. **(E)** PAO1 CFUs  
 942 scoring in BALFs after 18 h of infection with either the T3SS<sup>+</sup> or T3SS<sup>-</sup> *P. aeruginosa*  
 943 strains in control or clodronate treated mice as in **(A, C)**. **(F)** IL-1β release in BALFs of  
 944 control or clodronate treated mice infected with either the PAO1 T3SS<sup>+</sup> or T3SS<sup>-</sup> strains as  
 945 in **(B, D)**.

946 All data are representative results of 2 **(C-F)** and 3 **(A, B)** independent experiments.

947 **Supplementary information**

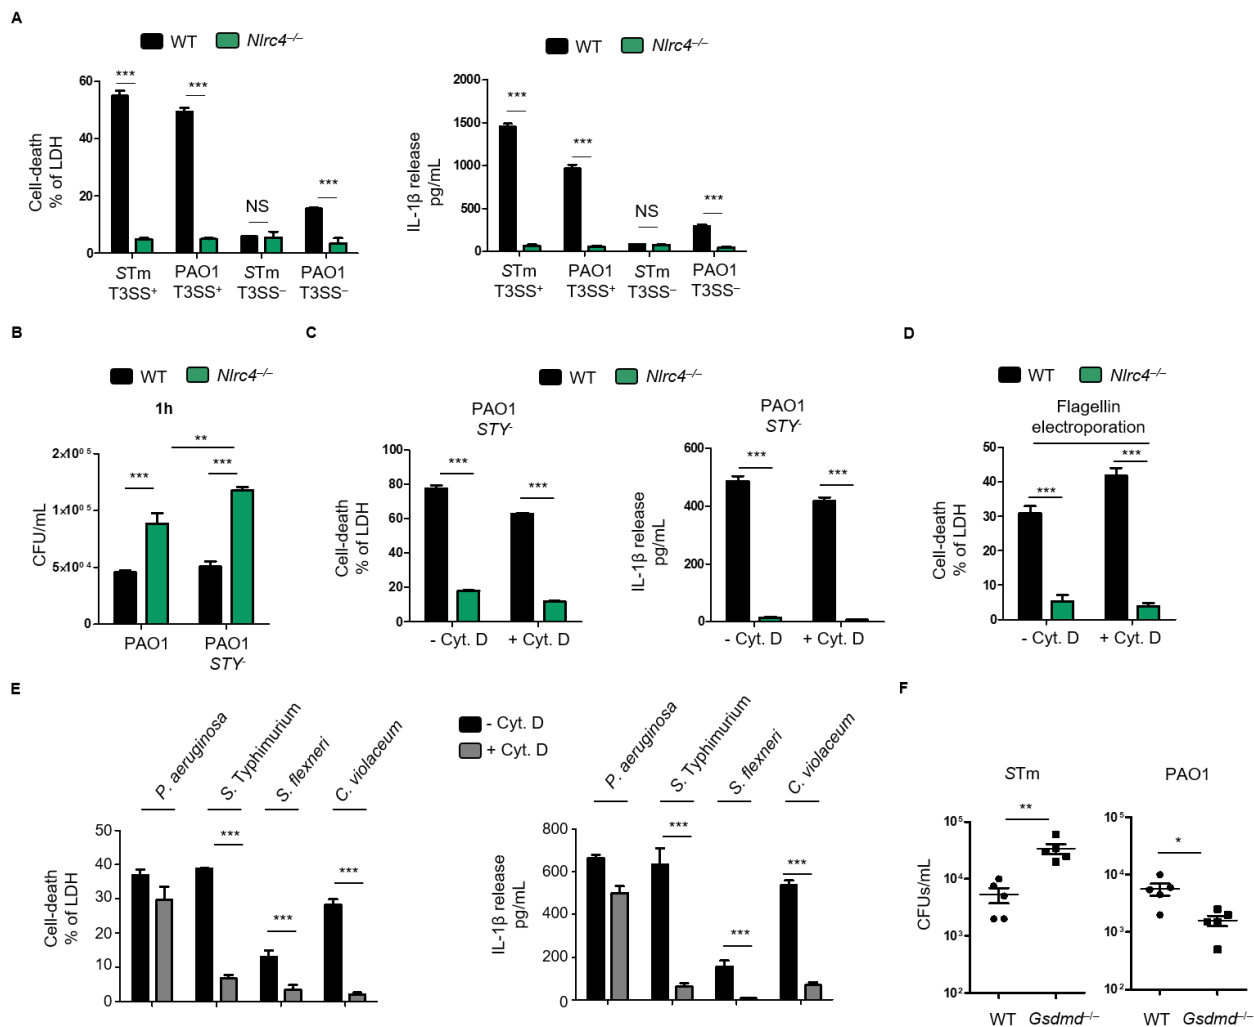

948

949 **Figure S1: *Pseudomonas aeruginosa* T3SS promotes phagocytosis-independent**  
 950 **activation of the NLRC4 inflammasome.**

951 BMDMs were primed with 100 ng/mL of the TLR2 ligand Pam<sub>3</sub>CSK<sub>4</sub> for 16 h to induce pro-  
 952 IL-1 $\beta$  expression and then infected for 3 hours (h) with various bacteria (MOI 15) or  
 953 inflammasome inducers.

954 **(A)** Measurement of cell death (LDH release) from WT and *Nlrc4*<sup>-/-</sup> BMDMs after 3 h of  
 955 infection with either T3SS<sup>+</sup> or T3SS<sup>-</sup> PAO1 or STm.

956 **(B)** CFU scoring in WT and *Nlrc4*<sup>-/-</sup> BMDMs infected for 1h with either PAO1 or STY-  
 957 deficient *P. aeruginosa*.



958 **(C)** LDH and IL-1 $\beta$  release quantifications of WT and *Nlrc4*<sup>-/-</sup> BMDMs infected for 3 h with  
959 either PAO1 or *STY*-deficient *P. aeruginosa* in presence or not of Cytochalasin D (0,2  
960  $\mu$ g/mL).

961 **(D)** LDH release quantifications of WT and *Nlrc4*<sup>-/-</sup> BMDMs, pretreated or not with  
962 Cytochalasin D (0,2  $\mu$ g/mL), electroporated (Neon™ Transfection System) with 0.5  
963  $\mu$ g/ml and then plated for 1 h.

964 **(E)** LDH and IL-1 $\beta$  released by WT BMDMs, pre-incubated or not with cytochalasin D  
965 (0.2 $\mu$ g/mL) for 30 minutes, and then infected with either *P. aeruginosa*, *S. Typhimurium*, *S.*  
966 *flexneri* or *C. violaceum*.

967 **(F)** CFU scoring in the peritoneal cavity of WT and *GsdmD*<sup>-/-</sup> mice infected for 6 h with  
968  $3 \cdot 10^6$  CFUs of *P. aeruginosa* and *S. Typhimurium*.

969 All graphs **(A-E)** show mean and s.d of quadruplicate wells from three pooled experiments.

970 **(F)** represents one experiment from three independent experiments.

971

972

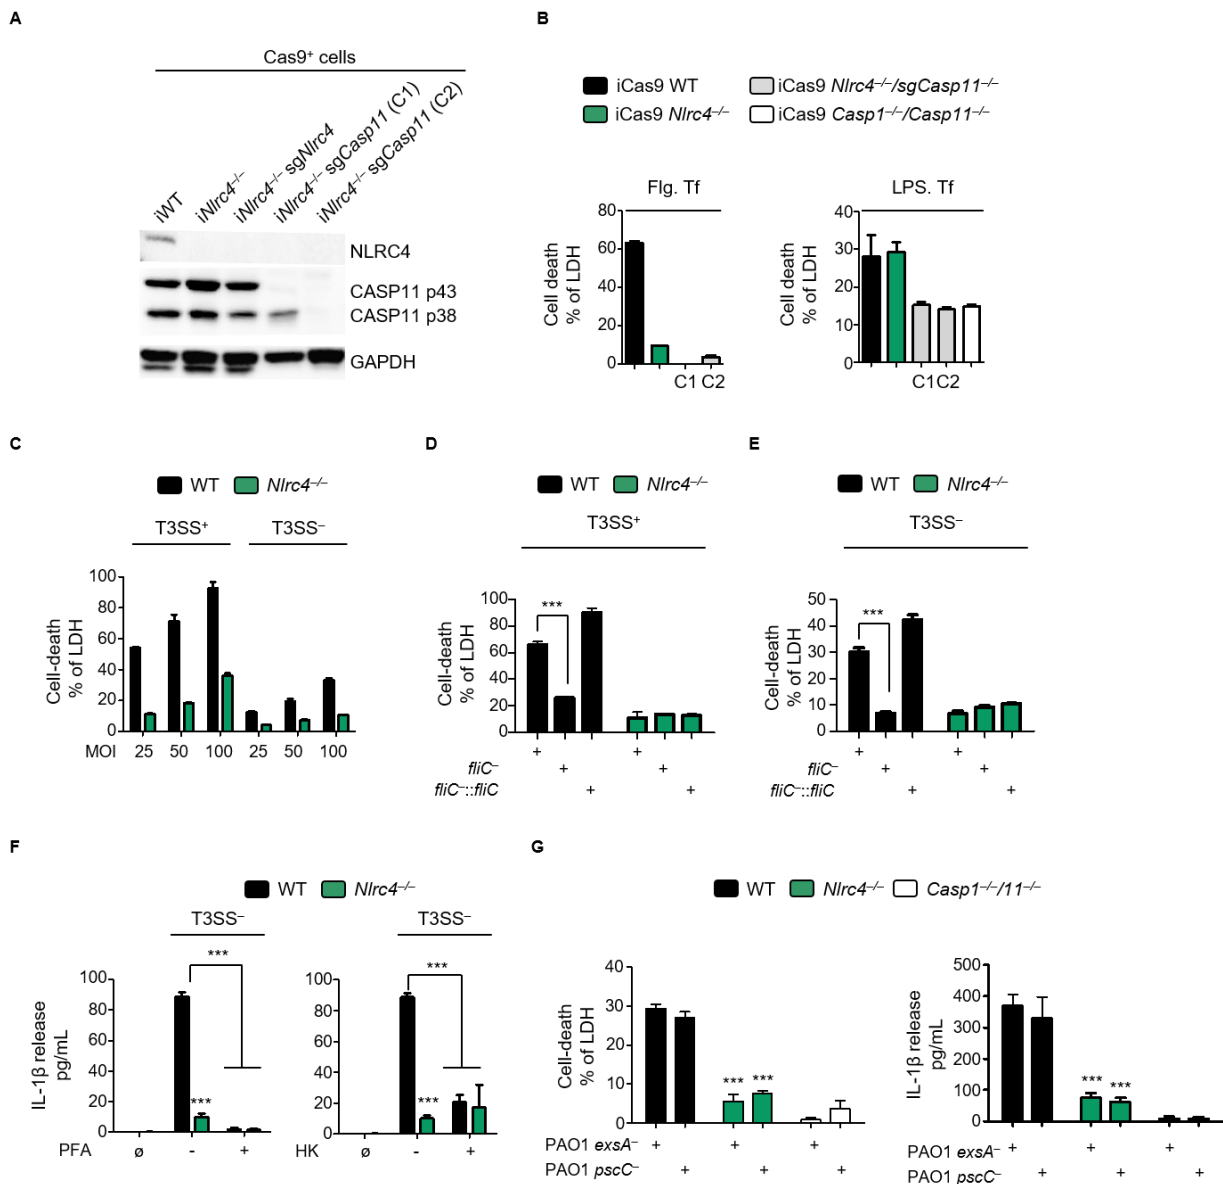

973

974 **Figure S2: *P. aeruginosa* triggers T3SS-independent activation of both NLRC4 and**  
 975 **Caspase11 inflammasomes.**

976 **(A, B) Biochemical (A) and functional (B) characterization of two iCas9Nlrc4<sup>-/-</sup>/sgCasp11<sup>-/-</sup>**  
 977 **CRISPR KO clones. (B), LDH release measurement of CRISPR clones (A) transfected**  
 978 **with either 0,5 μg/mL of Flagellin (2 hours) or 5μg/mL of LPS (10 hours).**

979 **(C) Cell death evaluation (LDH) in WT and Nlrc4<sup>-/-</sup> BMDMs infected with various MOIs of**  
 980 **PAO1 T3SS<sup>+</sup> or T3SS<sup>-</sup> for 3 h.**

981 **(D, E) LDH measurement in WT and Nlrc4<sup>-/-</sup> BMDMs infected by PAO1 T3SS<sup>+</sup>, T3SS<sup>-</sup> or**  
 982 **T3SS<sup>-</sup>/fliC<sup>-</sup>, complemented or not for flagellin expression (fliC<sup>-::</sup> fliC) for 3h with an MOI of**

983 50.

984 **(F)** Measurement of IL-1 $\beta$  release from WT and *Nlr4*<sup>-/-</sup> BMDMs after 3 h of infection with  
985 live, PFA-killed or heat killed (HK) T3SS deficient-PAO1 at an MOI of 50.  
986 **(G)** Measurement of LDH and IL-1 $\beta$  release from WT, *Nlr4*<sup>-/-</sup> and *Casp1*<sup>-/-</sup>/*11*<sup>-/-</sup> BMDMs  
987 after 3 h of infection with T3SS deficient-PAO1 *exsA*<sup>-</sup> or -PAO1 *pscC* at an MOI of 50.  
988 Graphs show mean and s.d of quadruplicate wells pooled from three independent  
989 experiments.  
990

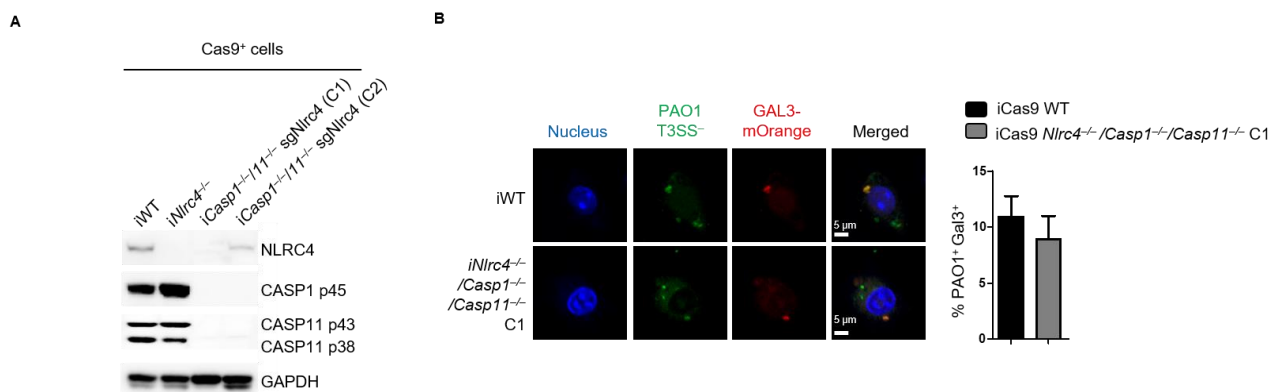

991

992 **Figure S3: T3SS- *P. aeruginosa* associate to altered phagosomes.**

993 **(A)** Biochemical characterization of two iCas9*Nlr4*<sup>-/-</sup>/*sgCasp11*<sup>-/-</sup> CRISPR KO clones.

994 **(B)** Fluorescence microscopy observations and quantifications of galectin-3 targeted  
995 PAO1 T3SS<sup>-</sup> (MOI 25, 3 h of infection) in iWT and iCasp1<sup>-/-</sup>/*11*<sup>-/-</sup>/*sgNlr4*<sup>-/-</sup> BMDMs  
996 transduced with galectin-3-morange.

997 Graphs show mean and s.d of quadruplicate wells from three independent pooled  
998 experiments. Immunoblotting representative of one experiment performed on various  
999 clones. Microscopy analysis visualized 10 fields containing approximately 200 cells using  
1000 Image J software.

1001

A

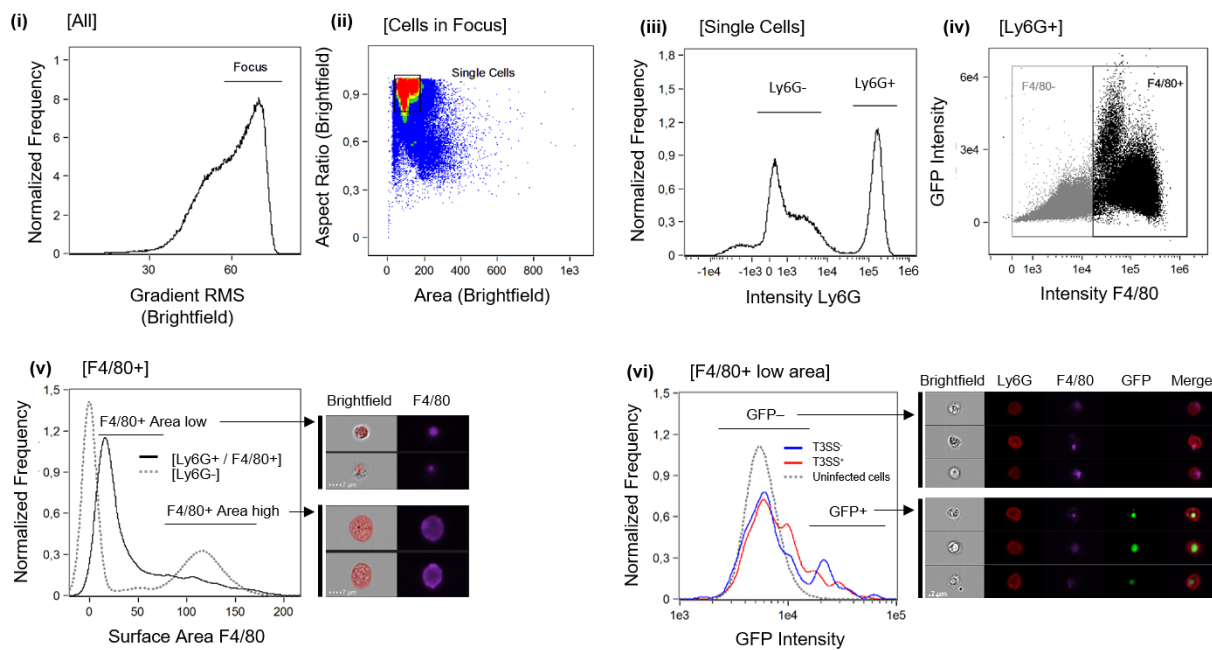

1002

1003 **Figure S4: ImagestreamX gating strategy used.**

1004 **(A)** ImagestreamX gating strategy used to visualize and quantify neutrophil-mediated  
 1005 efferocytosis of bacteria-containing macrophages.

1006 (i) A gate was set on cells in focus [Cells in Focus], then (ii) single cells [Single Cells] were  
 1007 gated. (iii) First, gate was put on Ly6G<sup>+</sup> Neutrophils [Ly6G<sup>+</sup>] and then we selected (iv)  
 1008 F4/80<sup>+</sup> macrophages [F4/80<sup>+</sup>] within Ly6G<sup>+</sup> population. (v) A mask based on the surface  
 1009 Area of F4/80<sup>+</sup> signal was applied to Ly6G<sup>+</sup>/F4/80<sup>+</sup> gate to discriminate efferocytosis of  
 1010 intact macrophages from fragmented macrophages. As a control, dotted gray line shows  
 1011 surface area of F4/80<sup>+</sup> signal in the [Ly6G<sup>-</sup>] gate. Then, (vi) we gated on [F4/80<sup>+</sup> low Area]  
 1012 and measured the intensity of the GFP signal. Red and Blue lines show the intensity of  
 1013 GFP signal measured in mice challenged with either *P. aeruginosa* T3SS<sup>+</sup> or T3SS<sup>-</sup>  
 1014 respectively. Finally, GFP<sup>+</sup> bacteria percentage within the gate (vi) was visualized. Upper  
 1015 image panel and lower image panel show representative images from the Neutrophils  
 1016 (Ly6G<sup>+</sup>)/macrophages (F4/80<sup>+</sup>) gate obtained in GFP<sup>-</sup> gate or GFP<sup>+</sup> gate respectively.

1017

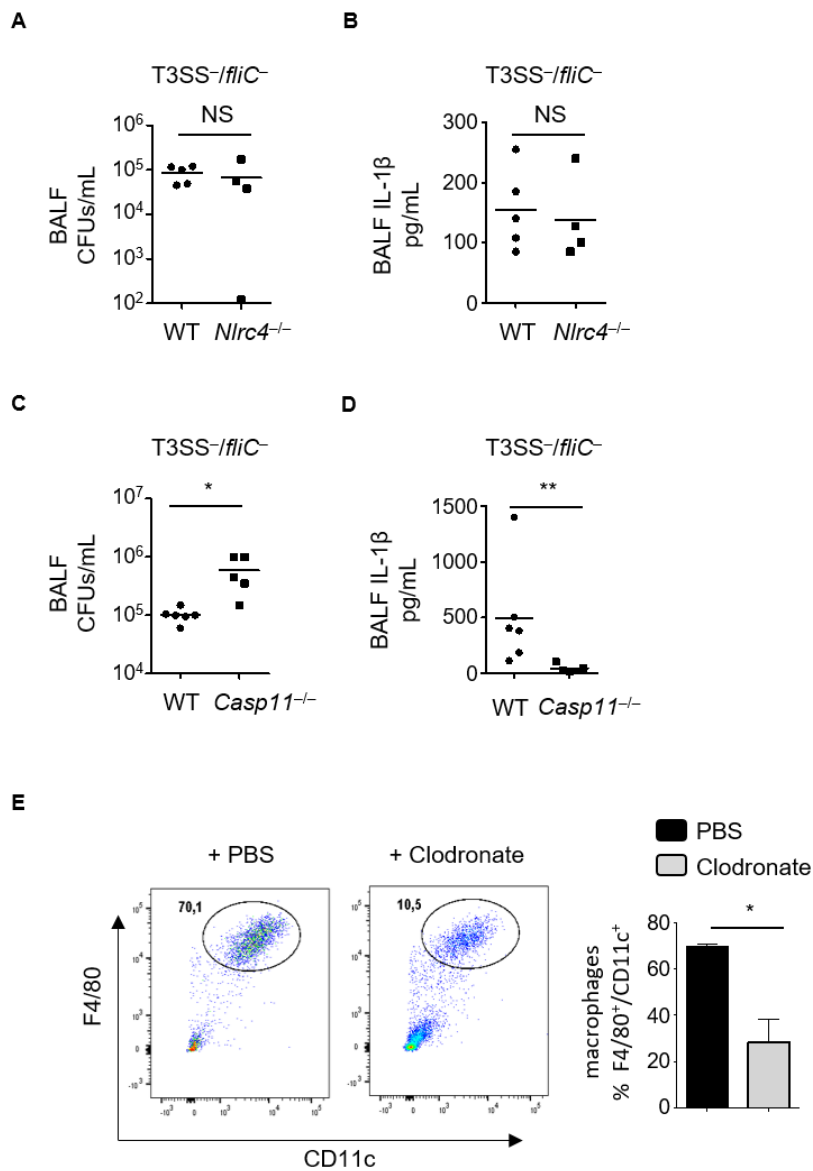

1018

1019 **Figure S5: NLRC4 and Caspase-11 only protect mice against T3SS-deficient *P.***  
1020 ***aeruginosa*.**

1021 **(A-D)** PAO1 CFUs scoring and IL-1β levels in BALFs from WT, *Nlrc4*<sup>-/-</sup> **(A, B)** or *Casp11*<sup>-/-</sup>

1022 **(C, D)** mice after 18 h of infection with T3SS-*fliC* *P. aeruginosa* strain with 1.5x10<sup>7</sup> CFUs.

1023 **(E)** FACS representation and quantification of depleted alveolar macrophages (F4/80<sup>+</sup>,

1024 CD11c<sup>+</sup>) in control (PBS) and clodronate instilled mice.

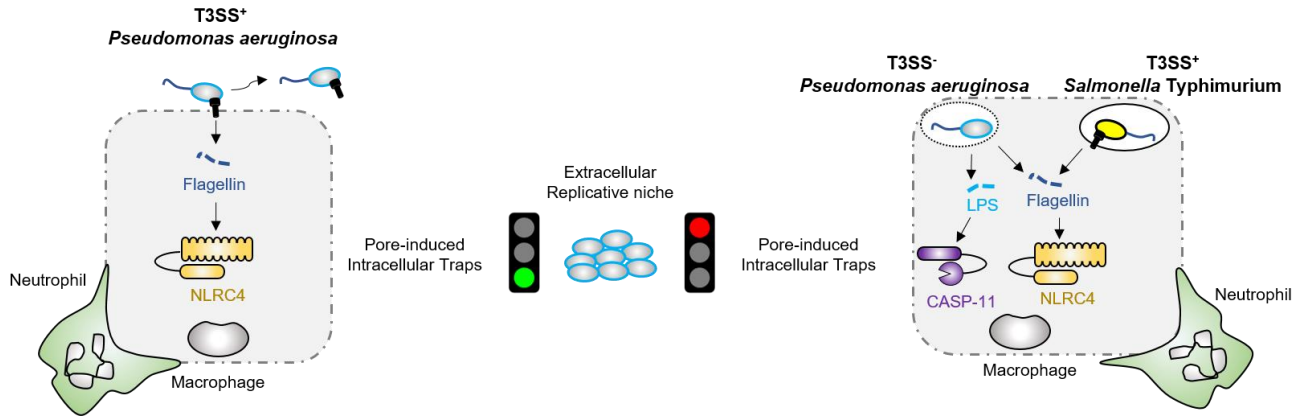

1025

## 1026 Graphical abstract.

1027 Macrophages infected with T3SS-expressing *P. aeruginosa* die in a NLRC4-dependent  
1028 manner, which allows bacterial escape from PIT-mediated cell-autonomous immunity and  
1029 neutrophil efferocytosis. However, T3SS-deficient *P. aeruginosa* is detected by both  
1030 NLRC4 and caspase-11 inflammasomes, which promotes bacterial trapping and  
1031 subsequent efferocytosis of *P. aeruginosa*-containing-PITs by neutrophils.

1032

1033

1034

1035

1036

1037

1038

1039

1040

1041

1042

1043

1044

1045 **Table S1:** All products, software and biological samples used in the current study,  
 1046 including their references and concentrations, are listed in table 1.

| Reagent                                         | Provider   | Reference     |
|-------------------------------------------------|------------|---------------|
| Antibodies                                      |            |               |
| Mouse anti-mouse caspase-1 1/4000 WB            | Adipogen   | AG20B-0042    |
| Rabbit anti-IL-18 1/2500 WB                     | Biovision  | 5180R-100     |
| Goat anti-mouse IL-1 $\beta$ 1/1000 WB          | R&D        | AF-401-NA     |
| Rabbit anti-mouse Gasdemin D 1/1000 WB          | Abcam      | ab209845      |
| Rat anti-mouse Caspase-11 (17D9) 1/1000 WB      | Novus      | NB120-10454   |
| Rabbit anti-mouse Nlrc4 1/1000 WB               | Abcam      | ab201792      |
| Mouse anti-mouse NLRP3 1/1000 WB                | AdipoGen   | AG-20B-0014   |
| Mouse anti- $\beta$ -actin 1/10000 WB           | Sigma      | A1978         |
| Rabbit anti-GAPDH 1/10000 WB                    | GeneTex    | GTX100118     |
| Rabbit anti-ASC 1/1000 IF                       | SantaCruz  | Sc-22514-R    |
| Chicken anti- <i>Pseudomonas</i> LPS 1/5000 IF  | Agrisera   | IMS01-133-332 |
| Anti-CD45-2-APC IF                              | Biolegends | 109818        |
| Anti-CD19-PE-Cf594 0.2 $\mu$ g/mL FACS          | Biolegends | 115554        |
| Anti-TCR $\beta$ -APC-Cy7 0.2 $\mu$ g/mL FACS   | Biolegends | 109220        |
| Anti-F4/80-BV421 50 $\mu$ g/mL FACS             | Biolegends | 123132        |
| Anti-CD11b-PE-Cy7 0.2 $\mu$ g/mL FACS           | Biolegends | 101216        |
| Anti-CD11c-A488 0.5 $\mu$ g/mL FACS             | Biolegends | 117311        |
| Anti-Ly6C-PercpC5 0.2 $\mu$ g/mL FACS           | Biolegends | 128012        |
| Anti-MHCII-PE 0.2 $\mu$ g/mL FACS               | Biolegends | 107608        |
| Anti-CD86-BV510 50 $\mu$ g/mL FACS              | Biolegends | 105039        |
| Anti-Ly6G-A647 0.5 $\mu$ g/mL FACS              | Biolegends | 127610        |
| Brilliant Violet 421™ anti-mouse F4/80 Antibody | Biolegends | 123131        |

|                                                          |                  |                        |
|----------------------------------------------------------|------------------|------------------------|
| anti-LY6G (APC-Vio770)                                   | Miltenyi-Biotech | 130-107-916            |
|                                                          |                  |                        |
| Sec antibodies                                           |                  |                        |
| Goat anti-Rat IgG (H&L) DyLight 488 IF 1/20<br>1/2000 IF | Diagomics        | GtxRt-003-<br>D488NHSX |
| Chicken anti-Goat IgG (H&L) DyLight 488<br>1/500 IF      | Diagomics        | CkxGt-003-<br>D488NHSX |
| Goat anti-Mouse IgG (H&L) DyLight 488<br>1/500 IF        | Diagomics        | GtxMu-003-<br>D488NHSX |
| Goat anti-Rabbit IgG (H&L) DyLight 488<br>1/500 IF       | Diagomics        | GtxRb-003-<br>D488NHSX |
| Donkey anti-Rabbit IgG (H&L) DyLight 550<br>1/500 IF     | Diagomics        | DkxRb-003-<br>D550NHSX |
| Goat anti-Rat IgG (H&L) DyLight 550 1/500<br>IF          | Diagomics        | GtxRt-003-<br>D550NHSX |
| Donkey anti-Goat IgG (H&L) DyLight 550<br>1/500 IF       | Diagomics        | DkxGt-003-<br>D550NHSX |
| Goat anti-Mouse IgG (H&L) DyLight 550<br>1/500 IF        | Diagomics        | GtxMu-003-<br>D550NHSX |
| Goat anti-Chicken IgG (H&L) DyLight 405<br>1/500 IF      | Diagomics        | GtxCk-003-<br>D405NHSX |
| Goat anti-Rabbit IgG (H&L) DyLight 633<br>1/500 IF       | Diagomics        | GtxRb-003-<br>D633NHSX |
| Goat anti-Rat IgG H&L) DyLight 633 1/500 IF              | Diagomics        | GtxRt-003-<br>D633NHSX |
| Hoescht                                                  | Sigma            | H6024                  |
| Rabbit anti-Goat IgG (H&L) HRP Conjugate<br>1/3000       | Diagomics        | RbxGt-003-<br>DHRPX    |



|                                                                                                                                                  |                              |                     |
|--------------------------------------------------------------------------------------------------------------------------------------------------|------------------------------|---------------------|
| Rabbit anti-Mouse IgG (H&L) HRP Conjugate<br>1/3000                                                                                              | Diagomics                    | RbxMu-003-<br>DHRPX |
| Goat-anti-mouse IgG (H+L) HRP conjugate<br>1/3000                                                                                                | Diagomics                    | R-05071-500         |
| Goat-anti-rabbit IgG (H+L) HRP conjugate<br>1/3000                                                                                               | Diagomics                    | R-05072-500         |
| Goat-anti-rat IgG (H+L) HRP conjugate<br>1/3000                                                                                                  | Diagomics                    | R-05075-500         |
| CSFE                                                                                                                                             | Biolegend                    | 423801              |
| TO-PRO <sup>®</sup> -3 Iodide (1/10000)                                                                                                          | Thermo Fischer<br>Scientific | T3605               |
| Bacterial and Virus Strains                                                                                                                      |                              |                     |
| PAO1                                                                                                                                             | (47)                         |                     |
| PAO1 $\Delta$ <i>exsA</i> (referred as T3SS <sup>-</sup> )                                                                                       | This study                   | N.A                 |
| PAO1 $\Delta$ <i>pscC</i>                                                                                                                        | This study                   | N.A                 |
| PAO1 $\Delta$ <i>exsA</i> , $\Delta$ <i>fliC</i>                                                                                                 | This study                   | N.A                 |
| PAO1 $\Delta$ <i>fliC</i> ( <i>fliC</i> )                                                                                                        | This study                   | N.A                 |
| PAO1 $\Delta$ <i>fliC::fliC</i>                                                                                                                  | This study                   | N.A                 |
| PAO1 $\Delta$ <i>exsA</i> , $\Delta$ <i>fliC::fliC</i>                                                                                           | This study                   | N.A                 |
| PAO1 mCherry                                                                                                                                     | This study                   | N.A                 |
| PAO1 $\Delta$ <i>exsA</i> mCherry (referred as T3SS <sup>-</sup> )                                                                               | This study                   | N.A                 |
| PAO1 GFP                                                                                                                                         | This study                   | N.A                 |
| PAO1 $\Delta$ <i>exsA</i> GFP (referred as T3SS <sup>-</sup> )                                                                                   | This study                   | N.A                 |
| STm SL1344 ( <i>orgA/ssaV</i> ), Tet <sup>R</sup> /Km <sup>R</sup><br>(grown in LB supplemented with 10 $\mu$ g/ml Tet<br>and 50 $\mu$ g/ml Kan) | (41, 42, 48)                 | N.A                 |

|                                                                                                                                                                                                                               |                                                       |             |
|-------------------------------------------------------------------------------------------------------------------------------------------------------------------------------------------------------------------------------|-------------------------------------------------------|-------------|
| STm SL1344 <i>orgA</i> <sup>-</sup> <i>flAG/B</i> <sup>-</sup> <i>fliC</i> <sup>-</sup> ,<br>Tet <sup>R</sup> /Cm <sup>R</sup> /Km <sup>R</sup><br>(grown in LB supplemented with 10µg/ml Tet,<br>25µg/ml Cm and 50µg/ml Kan) | (41, 42, 48)                                          | N.A         |
| <i>E. coli</i> Stbl4                                                                                                                                                                                                          | Thermo Fisher                                         | N.A         |
| <i>E. coli</i> Sm10                                                                                                                                                                                                           | Conjugative<br>strains<br>(Kanamycin) Km <sup>R</sup> | N.A         |
| Biological Samples                                                                                                                                                                                                            |                                                       |             |
| Chemicals, Peptides, and Recombinant Proteins                                                                                                                                                                                 |                                                       |             |
| FCS                                                                                                                                                                                                                           | Fisher Scientific                                     | 16010-159   |
| MCSF                                                                                                                                                                                                                          | L929 cell<br>supernatant                              | NA          |
| HEPES                                                                                                                                                                                                                         | Fisher Scientific                                     | SH30237.01  |
| Non-essential amino acids                                                                                                                                                                                                     | Invitrogen                                            |             |
| PAM3CSK4                                                                                                                                                                                                                      | Invivogen                                             | ttrl-pms    |
| LPS-EB ULTRAPURE                                                                                                                                                                                                              | Invivogen                                             | ttrl-3pelps |
| ATP (NLRP3 inflammasome inducer)                                                                                                                                                                                              | invivogen                                             | ttrl-atp    |
| Gentamycin                                                                                                                                                                                                                    | Invitrogen                                            | 15710-049   |
| Kanamycin                                                                                                                                                                                                                     | Sigma                                                 | 60615-5G    |

|                                             |                   |                        |
|---------------------------------------------|-------------------|------------------------|
| Irgasan                                     | Sigma             | 72779-25G              |
| LS Columns                                  | Miltenyi Biotec   | 130-042-401            |
| Anti-Ly-6G MicroBeads<br>UltraPure<br>mouse | Miltenyi Biotec   | 30-120-337             |
| BD Fixation/Permeabilisation Kit            | BD                | 554714                 |
| WB reagents                                 |                   |                        |
| ECL Clarity Max Substrate                   | BioRad            | 1705060                |
| ECL Clarity Max Substrate                   | BioRad            | 1705062                |
| Western Blot Strip Buffer                   | Diagomics         | R-03722-D50            |
| Tris base                                   | euromedex         | 200923-A               |
| SDS ultra-pure (4x)                         | Euromedex         | 1012                   |
| Acrylamide / Bisacrylamide 37.5/1 30%       | Euromedex         | EU0088-B               |
| Temed                                       | Sigma             | T9281-25ML             |
| Ammonium persulfate                         | Sigma             | 248614-100g248614-100g |
| Page Ruler 10-180 kDa                       | Fisher Scientific | 15744052               |
| Vectashield                                 | Vectalabs         | H-1000                 |

|                                      |                          |                        |
|--------------------------------------|--------------------------|------------------------|
| Triton X-100                         | Euromedex                | 2000                   |
| Hydrogen Peroxide                    | Sigma                    | 21763-500ml            |
| DMEM                                 | Fisher Scientific        | 41965-039              |
| LB                                   | Fisher Scientific        | BP1426-2               |
| LB Agar                              | INVITROGEN               | 22700025               |
| Cytochalasin D (0.2µg/mL)            | Sigma                    | C8273-1Mg              |
| Roche protease inhibitor cocktail    | Sigma                    | 0000000116974<br>98001 |
| Saponin                              | Bio Basic canada         | SB4521                 |
| BSA                                  | Sigma                    | A9647-100G             |
| Sucrose                              | Sigma                    | S7903                  |
| Clodronate Liposomes                 | Liposoma                 | 283539                 |
| Critical Commercial Assays           |                          |                        |
| IL-1β ELISA kit                      | ebiosciences             | 12354003               |
| LDH Cytotoxicity Detection Kit       | Takara                   | MK401                  |
| FAM-VAD-FMK FLICA Poly Caspase Assay | BioRad                   | ICT091                 |
| Neutrophil Isolation Columns         | MACS Miltenyi<br>Biotech | 130-097-658            |
| Experimental Models: Cell Lines      |                          |                        |
| <i>Naip5<sup>-/-</sup></i> BMDMs     | R.E.Vance                | N.A                    |

|                                                                                        |                                                                                           |     |
|----------------------------------------------------------------------------------------|-------------------------------------------------------------------------------------------|-----|
| <i>Naip1-6<sup>-/-</sup></i> BMDMs                                                     | R.E.Vance                                                                                 | N.A |
| C57BL/6 J primary BMDMs                                                                | Janvier                                                                                   | N.A |
| C57BL/6 N primary BMDMs                                                                | Charles River                                                                             | N.A |
| Immortalized <i>Casp-1<sup>-/-</sup>/-11<sup>-/-</sup></i> BMDMs                       | This study                                                                                | N.A |
| Immortalized <i>GBP<sup>Chr3-/-</sup></i> BMDMs                                        | This study                                                                                | N.A |
| Immortalized iCas9 <i>Nlrc4<sup>-/-</sup></i>                                          | This study                                                                                | N.A |
| Immortalized iCas9 <i>Casp-1<sup>-/-</sup>/-11<sup>-/-</sup></i>                       | This study                                                                                | N.A |
| Immortalized iCas9 <i>Casp-1<sup>-/-</sup>/-11<sup>-/-</sup>/sgNlrc4<sup>-/-</sup></i> | This study                                                                                | N.A |
| Immortalized iCas9 <i>Nlrc4<sup>-/-</sup>/sgCasp-11<sup>-/-</sup></i>                  | This study                                                                                | N.A |
| Experimental Models: Organisms/Strains                                                 |                                                                                           |     |
| C57BL/6 J mice                                                                         | Janvier                                                                                   | N.A |
| C57BL/6 N mice                                                                         | Charles River                                                                             | N.A |
| <i>Nlrc4<sup>-/-</sup></i> and <i>Casp11<sup>-/-</sup></i> mice                        | V.M Dixit<br>(Genentech)                                                                  | N.A |
| <i>Nlrp3<sup>-/-</sup></i> mice                                                        | P. Broz (Univ. of<br>Lausanne)                                                            | N.A |
| <i>Casp-1<sup>-/-</sup>/-11<sup>-/-</sup></i> mice                                     | R. Flavell                                                                                | N.A |
| <i>Nlrc4<sup>-/-</sup></i> mice                                                        | F. Sutterwala                                                                             | N.A |
| Oligonucleotides                                                                       |                                                                                           |     |
| <i>exsA</i> Rup Fw                                                                     | SIGMA:<br>ttccacacattatacga<br>gccggaagcataaat<br>gtaaagcaagcttGC<br>TGGCGTTGCTG<br>CTCGG | N.A |

|                         |                                                                                        |     |
|-------------------------|----------------------------------------------------------------------------------------|-----|
| <i>exsA</i> Rup Rv      | SIGMA:<br>TACCGGGCTTT<br>CAAAAAACGAT<br>TATAAGAACCC<br>CAACACTTCCC<br>G                | N.A |
| <i>exsA</i> Rdown Fw    | SIGMA:<br>AGTGTTGGGGT<br>TCTTATAATCGT<br>TTTTTGAAAGC<br>CCGGTAGC                       | N.A |
| <i>exsA</i> Rdown Rv    | SIGMA:<br>ggaaattaattaaggt<br>accgaattcgagctcg<br>agcccgggatccC<br>GTCTCCAGCTT<br>GCCG | N.A |
| <i>exsA</i> Rup check   | SIGMA:<br>TCGCCGACGGT<br>GACGGCAC                                                      | N.A |
| <i>exsA</i> Rdown check | SIGMA:<br>GAGCAGCGTCG<br>CCATGCCCC                                                     | N.A |

|                       |                                                                                           |     |
|-----------------------|-------------------------------------------------------------------------------------------|-----|
| <i>fliC</i> Rup Fw    | SIGMA:<br>ttccacacattatacga<br>gccggaagcataaat<br>gtaaagcaagcttAC<br>GCTATCCCGCC<br>TACCT | N.A |
| <i>fliC</i> Rup Rv    | SIGMA:<br>GTGAGTGACCG<br>TTCCCGGGCGG<br>TGATTTCTCC<br>AAAGGACCTAT<br>TTCG                 | N.A |
| <i>fliC</i> Rdown Fw  | SIGMA:<br>GTCCTTTGGAG<br>GAAATCACCGC<br>CCGGGAACGGT<br>CAC                                | N.A |
| <i>fliC</i> Rdown Rv  | SIGMA:<br>ggaaattaattaaggt<br>accgaattcgagctcg<br>agcccggggatccC<br>GCGCTGATCGC<br>ACTCT  | N.A |
| <i>fliC</i> Rup check | SIGMA:<br>ATTCTGCCCGG<br>ATGCCTTGC                                                        | N.A |

|                         |                                                                                             |     |
|-------------------------|---------------------------------------------------------------------------------------------|-----|
| <i>fliC</i> Rdown check | SIGMA:<br>CTTCGTTGGAA<br>GACTTGGCGG                                                         | N.A |
| <i>pscC</i> Rup fw      | SIGMA:<br>ttccacacattatacga<br>gccggaagcataaat<br>gtaaagcaagcttCG<br>GCTTCGGCACT<br>GGCGA   | N.A |
| <i>pscC</i> Rup Rv      | SIGMA:<br>CCATGCTAATT<br>CCCGCGCTCCA<br>GCAGGCGGCG<br>CATCAG                                | N.A |
| <i>pscC</i> Rdown fw    | SIGMA:<br>CCCTGATGCGC<br>CGCCTGCTGGA<br>GCGCGGGAATT<br>AGCATGGCC                            | N.A |
| <i>pscC</i> Rdown Rv    | SIGMA:<br>ggaaattaattaaggt<br>accgaattcgagctcg<br>agcccggggatccG<br>ATGAAATCCAC<br>GCCCTGGC | N.A |
| <i>pscC</i> Rup check   | SIGMA:<br>AGGAACTGGCC<br>AGGGTCGC                                                           | N.A |



|                          |                                                                                     |     |
|--------------------------|-------------------------------------------------------------------------------------|-----|
| <i>p</i> scC Rdown check | SIGMA:<br>CCCAGCCAGGC<br>TTGTCCG                                                    | N.A |
| JBOC FliC Fw             | SIGMA:<br>agccattcTCAGTG<br>AAGCATCAAGA<br>CTAACAATCct<br>acgggcgcgcatctcg<br>agg   | N.A |
| JBOC FliC rv             | SIGMA:<br>GAAAATCTTCT<br>CTCATCCGCCA<br>AAACAGCCAAG<br>CTAATTCtagcgc<br>agcaggctcag | N.A |
| Gal-3 up                 | Sigma:<br>GATCCTCGAGG<br>CCGCCACCATG<br>GTGAGCA                                     | N.A |
| Gal-3 down               | Sigma:<br>GATCGCGGCC<br>GCTTATATCAT<br>GGTATATGAAG<br>CACTG                         | N.A |

|                                        |                                                                                         |                                    |
|----------------------------------------|-----------------------------------------------------------------------------------------|------------------------------------|
| <i>Actin</i>                           | Sigma<br>Fw 5'-<br>agccatgtacgtagcc<br>atcc-3'<br>Rv 5'-<br>ctctcagctgtggtggt<br>gaa-3' | N.A                                |
|                                        |                                                                                         |                                    |
| Recombinant DNA                        |                                                                                         |                                    |
| pMSCV-Galectin-3-mOrange               | This study                                                                              |                                    |
| JBOC- <i>fliC</i> plasmid              | This study                                                                              | Addgene<br>deposit<br>number 74611 |
| pMSCV2.2                               | R.E. Vance                                                                              |                                    |
| LentiGuide-Puro                        | Feng Zhang lab                                                                          | addgen ref<br>52963                |
| pMD.2G                                 | Didier Trono lab                                                                        | addgene ref<br>12259               |
| p8.91                                  | Didier Trono lab                                                                        | N.A.                               |
| LentiCas9-Blast                        | Feng Zhang lab                                                                          | addgen ref<br>52962                |
| <i>Nirc4</i> targeting primer Forward: | Sigma-Aldrich<br>5'CACCG-<br>TTACTGTGAGC<br>CCTTGGAGC3'                                 |                                    |

|                                            |                                                          |     |
|--------------------------------------------|----------------------------------------------------------|-----|
| <i>Nlrc4</i> targeting primer reverse:     | Sigma-Aldrich<br>5'AAAC-<br>GCTCCAAGGGC<br>TCACAGTAA-C3' |     |
| <i>Caspase 11</i> targeting primer forward | Sigma-Aldrich<br>5'CACCG-<br>CTTAAGGTGTT<br>GGAACAGCT3'  |     |
| <i>Caspase 11</i> targeting primer reverse | Sigma-Aldrich<br>5'AAAC-<br>AGCTGTTCCAA<br>CACCTTAAG-C3' |     |
| Software and Algorithms                    |                                                          |     |
| Graph Pad Prism 5.0                        |                                                          | N.A |
| Image J                                    |                                                          | N.A |
| Snappene                                   | GSL Biotech LLC,<br>Chicago, U.S.A                       | N.A |
| <i>FlowJO</i>                              | FlowJo LLC                                               | N.A |
| <i>Fiji (Image J)</i>                      |                                                          | N.A |
| <i>Benchling Software</i>                  |                                                          | N.A |
| IDEAS software v2.6                        | Amnis                                                    |     |

1047

1048 Information and requests for reagents may be sent to Etienne Meunier

1049 ([Etienne.meunier@ipbs.fr](mailto:Etienne.meunier@ipbs.fr)) or Petr Broz ([Petr.broz@unil.ch](mailto:Petr.broz@unil.ch)).
